# Supplementary material for: Genome-wide analysis of defense-responsive genes in bacterial blight resistance of rice mediated by the recessive R gene xa13
Source: Springer Nature journal article supplement (doi:10.1007/s00438-003-0964-6), 2004-01-17
Supplement: supp.pdf [file supp.pdf]

Supplementary table 1. Defense-responsive sequences in bacterial blight resistance mediated by *xa13* gene

| EST                                                            | GenBank          | Mapping (BLASTN) |          |         | Function analysis (BLASTX)                             |         |
|----------------------------------------------------------------|------------------|------------------|----------|---------|--------------------------------------------------------|---------|
|                                                                | accession number | Chr <sup>b</sup> | Homolog  | E value | Homolog                                                | E value |
| <b>Disease-resistance-like and defense-responsive activity</b> |                  |                  |          |         |                                                        |         |
| 1B05 <sup>e</sup>                                              | CD150886         | 10               | AC098696 | e-107   | putative NBS-LRR type resistance protein (AAL77135)    | 6e-63   |
| 2I18 <sup>c,f</sup>                                            | CD151045         | 2                | AP005007 | 0       | putative disease resistance protein (AAM47626)         | e-15    |
| 2I04 <sup>f</sup>                                              | CD151032         | 1                | AP003735 | e-168   | NBS-LRR type resistance gene (BAA93618)                | 8.6     |
| 1O21 <sup>a,e</sup>                                            | CD151441         | 12               | AL713908 | 2e-70   | putative MLA6 protein (AAN04517)                       | e-06    |
| C3 <sup>a,e</sup>                                              | CD150760         |                  |          |         | putative protein kinase Xa21 type precursor (BAC10827) | 2e-41   |
| C12 <sup>e</sup>                                               | CD150769         | 2                | AP004747 | 9e-39   | putative protein kinase Xa21 type precursor BAC10827)  | 2e-76   |
| C16 <sup>a,e</sup>                                             | CD150773         |                  |          |         | putative protein kinase Xa21 type precursor (BAC10827) | 7e-32   |
| C33 <sup>g</sup>                                               | CD150790         |                  |          |         | putative protein kinase Xa21 type precursor (BAC10827) | 7e-28   |
| C38 <sup>a,g</sup>                                             | CD151455         |                  |          |         | putative protein kinase Xa21 type precursor (BAC10827) | 5e-47   |
| C97 <sup>a,e</sup>                                             | CD150853         | 2                | AP004747 | 2e-42   | putative protein kinase Xa21 type precursor (BAC10827) | 3e-24   |
| 1P17 <sup>a,e</sup>                                            | CD151165         |                  |          |         | putative protein kinase Xa21 type precursor (BAC10827) | 0.029   |
| 1D10 <sup>a,e</sup>                                            | CD151215         |                  |          |         | putative protein kinase Xa21 type precursor (BAC10827) | 2e-13   |

|                     |          |    |          |       |                                                                       |       |
|---------------------|----------|----|----------|-------|-----------------------------------------------------------------------|-------|
| 1M21 <sup>e</sup>   | CD151405 | 7  | AP004262 | 4e-05 | putative protein kinase Xa21 type precursor (BAC10827)                | 6e-20 |
| 3H04 <sup>a,f</sup> | CD150987 |    |          |       | putative protein kinase Xa21 type precursor (BAC10827)                | 2e-39 |
| 1A09 <sup>c,e</sup> | CD151179 | 12 | AL713901 | e-142 | putative disease resistance response protein (AAM74358)               | 2e-07 |
| 1K02 <sup>c,e</sup> | CD151048 | 3  | AC092075 | 4e-43 | disease-resistant-related protein (AAL78367)                          | e-31  |
| C73 <sup>e</sup>    | CD150829 | 12 | AL845342 | 0     | pathogenesis-related protein PR-10a (AAF85972)                        | 6e-16 |
| 2P03 <sup>a,f</sup> | CD151145 |    |          |       | pathogenesis-related protein class 1 (AAB49685)                       | 8e-12 |
| 2M16 <sup>c,f</sup> | CD151120 | 8  | AP003887 | 2e-60 | L-ascorbate peroxidase-like protein (CAA16959)                        | 6e-04 |
| C67 <sup>f</sup>    | CD150823 | 3  | AC137076 | 1e-89 | putative phospholipid hydroperoxide glutathione peroxidase (CAC17628) | 2e-77 |
| 2A13 <sup>f</sup>   | CD150876 | 9  | AP005392 | e-135 | WRKY transcription factor (AAN16970)                                  | 2e-67 |
| C50 <sup>c,e</sup>  | CD150806 | 12 | AL731739 | 2e-22 | putative glutathione S-transferase (AAN05495)                         | 4e-36 |
| C76 <sup>c,e</sup>  | CD150832 | 3  | AC099399 | 0     | putative glutathione S-transferase (AAN05495)                         | e-77  |
| 1B14 <sup>e</sup>   | CD150875 | 5  | AC108502 | e-180 | putative glutathione S-transferase (AAK98539)                         | 1     |
| 2D15 <sup>b,f</sup> | CD150918 | 3  | AC120983 | 4e-24 | RNA helicase (RH16) (CAB80208)                                        | 2e-22 |
| 2E01 <sup>f</sup>   | CD150934 | 3  | AC118669 | 0     | ATP-dependent RNA helicase-like protein (AAM53340)                    | 2e-79 |
| 2D17 <sup>c,f</sup> | CD150928 | 3  | AC096687 | 5e-91 | putative RNA helicase (AAL797530)                                     | 6e-78 |
| 1A19 <sup>b,e</sup> | CD151175 | 4  | AL663006 | e-31  | putative RNA helicase (AAG13612)                                      | 6e-14 |

|                     |          |    |          |       |                                                         |       |
|---------------------|----------|----|----------|-------|---------------------------------------------------------|-------|
| 3F01 <sup>f</sup>   | CD150939 | 4  | AL731606 | e-118 | 26S proteasome regulatory particle subunit 6 (BAB78501) | 9e-25 |
| 1P16 <sup>c,e</sup> | CD151148 | 1  | AP003260 | e-67  | alpha 7 subunit of 20S proteasome (BAA96833)            | 3e-64 |
| 2K24 <sup>c,f</sup> | CD151377 | 9  | AC108760 | 5e-67 | beta 7 subunit of 20S proteasome (BAA96839)             | 5e-57 |
| 1E09 <sup>e</sup>   | CD151245 | 11 | AC120885 | e-118 | alpha 5 subunit of 20S proteasome (BAA96832)            | 7e-05 |
| 3K11 <sup>f</sup>   | CD151375 | 2  | AP004095 | 2e-39 | 26S proteasome regulatory particle subunit 1 (BAB17624) | 2e-11 |
| 1N09 <sup>c,e</sup> | CD151398 | 8  | AP003912 | e-118 | proteasome alpha subunit (AAB51521)                     | 3e-54 |
| 2G18 <sup>c,f</sup> | CD151007 | 10 | AC051633 | 0     | putative ubiquitin protein (AAG13589)                   | e-94  |
| 3D08 <sup>c,f</sup> | CD151206 | 2  | AP004889 | e-165 | ubiquitin-like protein (BAB10203)                       | 0.001 |
| 1J02 <sup>e</sup>   | CD151012 | 7  | AP005462 | e-180 | putative ankyrin-like protein (BAB64778)                | 3e-06 |
| 2G08 <sup>c,f</sup> | CD151271 | 2  | AP004000 | 4e-37 | putative cytochrome P450 (BAB61166)                     | 4e-35 |
| 2O19 <sup>c,f</sup> | CD151428 | 1  | AP003330 | 0     | putative cytochrome P450 (BAB89974)                     | 7e-80 |
| 1C05 <sup>c,e</sup> | CD150920 | 2  | AP004000 | e-171 | putative cytochrome P450 (BAB39252)                     | 2e-29 |
| 1L21 <sup>e</sup>   | CD151364 | 8  | AP005799 | 3e-06 | metallothionein-like protein (AAF03603)                 | 2e-04 |
| C65 <sup>g</sup>    | CD150821 | 12 | AL845346 | 7e-13 | metallothionein-like protein (AAA80335)                 | e-21  |
| C68 <sup>e</sup>    | CD150824 | 2  | AP004867 | 9e-61 | catalase (BAA06232)                                     | e-22  |
| C58 <sup>f</sup>    | CD150814 | 1  | AP003240 | e-73  | Os-FIERG1 gene product (AAC04627)                       | 5e-67 |

### DNA binding

|                       |          |                |          |       |                                                               |       |
|-----------------------|----------|----------------|----------|-------|---------------------------------------------------------------|-------|
| C41 <sup>e</sup>      | CD150797 | 3              | AC084405 | 0     | zinc finger protein (BAA33205)                                | e-07  |
| 2O05 <sup>f</sup>     | CD151157 | 5              | AC135924 | e-129 | zinc finger protein 54 (AAC29445)                             | 1     |
| 3H02 <sup>f</sup>     | CD150975 | 8              | AP005734 | e-100 | transcriptional coactivator - like protein (BAC07443)         | 9e-20 |
| 3L04 <sup>f</sup>     | CD151068 | 12             | AL837528 | 7e-66 | RISBZ4 (transcription activator) (BAB39174)                   | 2e-19 |
| 1I01 <sup>a,e</sup>   | CD151010 | 11             | AC123527 | 0     | putative transcription factor (AAL79736)                      | 3e-11 |
| 2O10 <sup>c,f</sup>   | CD151435 | 3              | AC105733 | 5e-69 | putative transcription factor (AAN61483)                      | 3e-10 |
| 1B01 <sup>b,e</sup>   | CD150869 | 5              | AC130729 | 0     | transcription factor-like protein (BAC07004)                  | e-21  |
| 1I04 <sup>a,e</sup>   | CD151029 | 11             | AC123527 | 3e-28 | putative transcription factor (AAL79736)                      | 2e-05 |
| 1P06 <sup>a,c,e</sup> | CD151156 | 3              | AC093713 | 0     | putative C3HC4 zinc finger protein (AAB63079)                 | 0.044 |
| 2H03 <sup>c,f</sup>   | CD150984 | 2              | AP005323 | 0     | putative myb-related protein (AAL87171)                       | e-37  |
| 3G16 <sup>b,f</sup>   | CD150996 | 4              | AL731616 | e-144 | putative zinc finger protein (BAB85374)                       | 2.7   |
| 2F01 <sup>f</sup>     | CD150936 | 1 <sup>c</sup> | AP003273 | 7e-68 | histone H1-like protein (BAB92342)                            | 4e-39 |
|                       |          | 7              | AP005156 | 3e-40 |                                                               |       |
| 3I02 <sup>f</sup>     | CD151018 | 4              | AL606594 | 0     | micronuclear linker histone polyprotein (AAC18874)            | 7e-05 |
| 3L08 <sup>c,f</sup>   | CD151345 | 7              | AP004378 | 6e-50 | putative chromodomain-helicase-DNA-binding protein (BAC16056) | 4e-34 |
| 3N07 <sup>b,f</sup>   | CD151390 | 3              | AC092262 | e-127 | replication protein A1-like (BAB09168)                        | 3.4   |
| 3M22 <sup>b,f</sup>   | CD151410 | 4              | AL732340 | e-109 | BarH1 (homeobox gene) (AAA28381)                              | 0.93  |

|                               |          |    |          |       |                                                          |       |
|-------------------------------|----------|----|----------|-------|----------------------------------------------------------|-------|
| 1G13 <sup>b,e</sup>           | CD150976 | 5  | AC093489 | 0     | NDX1 homeobox protein (CAA09794)                         | e-14  |
| 3M15 <sup>c,f</sup>           | CD151119 | 4  | AL606639 | e-134 | basic helix-loop-helix transcription factor (CAD53343)   | 0.98  |
| C95 <sup>c,e</sup>            | CD150851 | 3  | AC119747 | 2e-68 | semaphorin (AAC50810)                                    | 5.2   |
| 3M04 <sup>f</sup>             | CD151112 | 5  | AC135418 | 5e-89 | insulin promoter factor 1 (CAA52389)                     | 4.1   |
| <b>RNA binding</b>            |          |    |          |       |                                                          |       |
| 1G02 <sup>e</sup>             | CD150971 | 10 | AC077693 | 0     | putative eukaryotic initiation factor subunit (AAL86464) | 3e-91 |
| 2M22 <sup>f</sup>             | CD151407 | 12 | AL731759 | e-170 | translation initiation factor 5A(AAC67555)               | 5e-24 |
| 3A10 <sup>f</sup>             | CD151185 | 7  | AP004275 | 3e-74 | translation initiation factor 5A (AAC67555)              | 5e-50 |
| 2I05 <sup>c,f</sup>           | CD151039 | 3  | AC084404 | 3e-55 | putative translation initiation factor (AAK50586)        | 2e-60 |
| 3G11 <sup>f</sup>             | CD151295 | 7  | AP004674 | 5e-60 | translation initiation factor (AAC67556)                 | 2e-04 |
| 1H05 <sup>c,e</sup>           | CD150998 | 4  | AL606450 | 0     | putative elongation factor 2 (BAB91927)                  | 9e-80 |
| 3E09 <sup>f</sup>             | CD151251 | 2  | AP004023 | 0     | translational elongation factor Tu (AAL73431)            | 4e-75 |
| C27 <sup>c,g</sup>            | CD150784 | 1  | AP003760 | e-126 | putative U2 snRNP auxiliary factor (BAB90507)            | 2e-11 |
| C30 <sup>c,f</sup>            | CD150787 | 4  | AL662979 | e-152 | similar to RNA-binding protein (BAB10647)                | e-21  |
| <b>Other binding activity</b> |          |    |          |       |                                                          |       |
| C21 <sup>c,g</sup>            | CD150778 | 8  | AP005441 | e-121 | similar to symbiosis-related like protein (AAC28521)     | 4e-32 |
| C35 <sup>c,f</sup>            | CD150792 | 2  | AP004134 | 5e-16 | lipid transfer protein (AAB18815)                        | 6e-15 |

|                       |          |                |          |       |                                                      |       |
|-----------------------|----------|----------------|----------|-------|------------------------------------------------------|-------|
| C85 <sup>g</sup>      | CD150841 | 8 <sup>c</sup> | AP004574 | 4e-56 | GF14-d protein (AAB07458)                            | 3e-66 |
|                       |          | 11             | AC134053 | e-77  |                                                      |       |
| 1A05 <sup>e</sup>     | CD150885 | 2              | AP003975 | e-177 | putative hydroxyproline-rich glycoprotein (BAB89945) | 8.6   |
| 2D01 <sup>c,f</sup>   | CD150897 | 1              | AP003278 | 6e-68 | chlorophyll a/b binding protein (AAC15992)           | e-30  |
|                       |          | 7              | AP004270 | e-140 |                                                      |       |
| 2E02 <sup>a,c,f</sup> | CD150935 | 3              | AC084767 | 6e-04 | chlorophyll a/b binding protein (AAB18404)           | e-06  |
| 2N18 <sup>c,f</sup>   | CD151131 | 9              | AP005882 | 3e-31 | putative chloroplast DNA-binding protein (AAL79734)  | 4e-04 |
| 1I06 <sup>c,e</sup>   | CD151037 | 7              | AP004010 | e-93  | 23 kDa polypeptide of photosystem II (BAA08564)      | 9e-06 |
| 1P04 <sup>c,e</sup>   | CD151144 | 7              | AP003957 | 2e-89 | putative photosystem II 10 kD polypeptide (BAC1975)  | e-19  |
| C7 <sup>c,e</sup>     | CD150764 | 8              | AP004589 | e-130 | photosystem II 10 kD polypeptide (AAB46718)          | 1e-20 |
| 1E06 <sup>c,e</sup>   | CD150959 | 2              | AP004841 | e-141 | KEULE (NP_563905)                                    | 2e-36 |
| 1H18 <sup>b,e</sup>   | CD151006 | 5              | AC097175 | 3e-62 | ADP-ribosylation factor 1-like protein (CAD48129)    | e-53  |
| 1L04 <sup>b,e</sup>   | CD151063 | 3              | AC134769 | 0     | putative extensin (AAC69930)                         | 3.7   |
| 2L04 <sup>c,f</sup>   | CD151066 | 8              | AP003888 | e-92  | FK506 binding protein (AAD29708)                     | 6e-47 |
| 1K16 <sup>e</sup>     | CD151070 | 2              | AP004144 | e-110 | putative calmodulin-binding protein (BAB64623)       | e-25  |
| 3K22 <sup>a,c,f</sup> | CD151370 | 1              | AP003214 | 0     | putative calmodulin-binding protein (BAB64623)       | 5e-39 |
| 1E10 <sup>e</sup>     | CD151246 | 12             | AL845342 | e-110 | putative calmodulin-binding protein (AAM19014)       | 4.5   |
| 2N22 <sup>f</sup>     | CD151409 | 4              | AL731606 | 2e-11 | calmodulin-binding protein (AAA33446)                | 2e-04 |

|                       |          |    |          |       |                                                         |       |
|-----------------------|----------|----|----------|-------|---------------------------------------------------------|-------|
| 3N05 <sup>f</sup>     | CD151125 | 6  | AP001389 | e-158 | S-locus pollen protein (BAB86355)                       | 3.9   |
| 1C07 <sup>e</sup>     | CD151200 | 3  | AC120531 | e-159 | similar to 7 transmembrane receptor (CAB01517)          | 0.52  |
| 3C07 <sup>f</sup>     | CD151205 |    |          |       | putative GTP-binding protein (AAK98738)                 | 4e-14 |
| 1I21 <sup>c,e</sup>   | CD151317 | 8  | AP005416 | 5e-54 | putative GTP-binding protein (AAM23059)                 | 2e-34 |
| 1J21 <sup>c,e</sup>   | CD151319 | 8  | AP005416 | 2e-21 | putative GTP-binding protein (AAM63059)                 | 0.003 |
| 1H23 <sup>a,e</sup>   | CD151298 |    |          |       | putative GTP-binding protein (AAM63059)                 | 0.58  |
| 3D19 <sup>f</sup>     | CD151211 | 3  | AC092558 | 3e-95 | putative cop-coated vesicle membrane protein (AAP13000) | 5e-08 |
| 3D20 <sup>a,c,f</sup> | CD151212 | 8  | AP005441 | 0     | RERE (BAA95898)                                         | 1.3   |
| 2I07 <sup>f</sup>     | CD151304 | 6  | AP004685 | 2e-90 | high mobility group protein (AAC78104)                  | 4e-09 |
| 1I22 <sup>a,e</sup>   | CD151318 | 12 | AL513403 | e-141 | importin-beta 2 (BAA34862)                              | 2e-35 |
| 3L22 <sup>c,f</sup>   | CD151371 | 7  | AP004339 | e-119 | putative ribonucleoprotein (BAC10140)                   | 2e-75 |
| 2O23 <sup>f</sup>     | CD151450 | 4  | AL512547 | 4e-60 | putative small nuclear ribonucleoprotein G (AAK55776)   | 6e-04 |
| C44 <sup>c,f</sup>    | CD150800 | 1  | AP003243 | 0     | putative telomere repeat binding factor (BAB89031)      | 3e-30 |
| 1F11 <sup>c,e</sup>   | CD151259 | 1  | AP003232 | e-104 | cystatin (BAB92242)                                     | 3e-18 |
| 3O07 <sup>f</sup>     | CD151424 | 10 | AC078839 | e-112 | centrin (AAK13107)                                      | 0.058 |
| 2K15 <sup>f</sup>     | CD151073 | 6  | AP004804 | e-57  | putative formin binding protein (BAB91867)              | 0.78  |
| C71 <sup>f</sup>      | CD150827 |    |          |       | similarity to myosinase-binding protein (AAF29383)      | 5.8   |

## Chaperone

|                     |          |   |          |       |                                                                                |       |
|---------------------|----------|---|----------|-------|--------------------------------------------------------------------------------|-------|
| C40 <sup>f</sup>    | CD150796 | 6 | AC091774 | e-112 | heat shock protein (AAL79732)                                                  | e-63  |
| 3C05 <sup>c,f</sup> | CD150923 | 9 | AP005392 | 0     | heat shock protein 82 (HSP82) (CAA77978)                                       | 5e-83 |
| 1J22 <sup>e</sup>   | CD151320 | 3 | AC096688 | 0     | HSP70 (BAA06359)                                                               | 5.8   |
| 1M01 <sup>e</sup>   | CD151092 | 9 | AP005392 | 2e-05 | heat shock protein hsp82 (CAA78738)                                            | e-08  |
| C87 <sup>f</sup>    | CD150843 | 7 | AP004342 | e-140 | putative heat shock protein (AAK63929)                                         | 5.2   |
| 2G03 <sup>f</sup>   | CD150983 |   |          |       | putative rubisco subunit binding-protein alpha subunit precursor (AAL83689)    | 7e-31 |
| 3I05 <sup>c,f</sup> | CD151042 | 2 | AP004191 | e-122 | DnaJ (chaperone protein) homologue (BAB11149)                                  | 3e-37 |
| 3N01 <sup>f</sup>   | CD151097 | 4 | AL731613 | 2e-97 | DnaJ-like protein (CAC39071)                                                   | 9e-44 |
| 3N03 <sup>f</sup>   | CD151113 | 4 | AL731613 | 2e-22 | DnaJ-like protein (CAC39071)                                                   | 5e-07 |
| 2H23 <sup>f</sup>   | CD151301 |   |          |       | DnaJ-like protein (CAC39071)                                                   | 2e-11 |
| 1G07 <sup>e</sup>   | CD151268 | 6 | AP001389 | 2e-56 | 60 KD chaperonin beta subunit (BAA92724)                                       | 2e-56 |
| 2H12 <sup>b,f</sup> | CD151294 | 5 | AC084818 | e-98  | putative peptidyl-prolyl cis-trans isomerase, chloroplast precursor (BAB39968) | 2e-31 |
| 1I24 <sup>e</sup>   | CD151331 | 8 | AP004565 | e-171 | copper chaperone homolog CCH (AAF15285)                                        | 7e-16 |
| 2G16 <sup>f</sup>   | CD150992 | 6 | AP005459 | 0     | heavy-chain binding protein BiP (AAB08760)                                     | 7.5   |
| C39 <sup>f</sup>    | CD150795 | 1 | AP003331 | e-140 | putative protein disulfide isomerase (BAB67990)                                | 5e-43 |



|                            |          |    |          |       |                                                    |       |
|----------------------------|----------|----|----------|-------|----------------------------------------------------|-------|
| 1F09 <sup>e</sup>          | CD151247 | 1  | AP003331 | 8e-53 | putative protein disulfide isomerase (BAB67990)    | 2e-55 |
| <b>Apoptosis regulator</b> |          |    |          |       |                                                    |       |
| C100 <sup>b,f</sup>        | CD150856 | 5  | AC104278 | 2e-39 | putative apoptosis-related protein 19 (AAM20277)   | 3e-35 |
| 1F22 <sup>c,e</sup>        | CD151252 | 3  | AC090485 | 7e-84 | putative cell death suppressor protein (AAK98735)  | 6e-75 |
| <b>Enzyme</b>              |          |    |          |       |                                                    |       |
| 1E15 <sup>e</sup>          | CD150953 | 1  | AP003240 | e-125 | ribonuclease II-like protein (BAB86443)            | 8e-64 |
| 1D15 <sup>a,e</sup>        | CD150916 |    |          |       | ribonuclease II-like protein (BAB86443)            | 3e-06 |
| C8 <sup>b,e</sup>          | CD150765 | 11 | AC128644 | 9e-44 | DNA polymerase delta catalytic subunit (BAA99573)  | 5e-60 |
| 3A04 <sup>c,f</sup>        | CD150881 | 4  | AL606657 | e-109 | Poll-like DNA polymerase (BAB40805)                | e-68  |
| C60 <sup>c,f</sup>         | CD150816 | 4  | AL442106 | e-159 | RNA polymerase beta subunit-2 (CAA60278)           | 8.9   |
| 2M24 <sup>c,f</sup>        | CD151418 | 7  | AP004333 | e-113 | poly(A) polymerase-like protein (BAC21345)         | 8.1   |
| C9 <sup>f</sup>            | CD150766 | 4  | AL606594 | 2e-58 | protein phosphatase (AAA74625)                     | 6e-11 |
| C18 <sup>c,f</sup>         | CD150775 | 1  | AP004330 | 4e-21 | putative serine palmitoyltransferase (BAB90753)    | 1e-97 |
| C19 <sup>c,g</sup>         | CD150776 | 9  | AP005558 | e-101 | putative aldo/keto reductase (BAC19952)            | 7e-08 |
| C22 <sup>c,f</sup>         | CD150779 | 3  | AC121490 | e-55  | putative foyllypolyglutamate synthetase (AAG13624) | 3e-71 |
| C26 <sup>f</sup>           | CD150783 | 6  | AP004744 | 2e-54 | Xaa-Pro aminopeptidase 1 (CAC59823)                | 2e-44 |
| 2K18 <sup>f</sup>          | CD151088 | 6  | AP003628 | e-79  | Xaa-Pro aminopeptidase 2 (CAC59824)                | 4e-43 |

|                       |          |                |          |       |                                                                   |       |
|-----------------------|----------|----------------|----------|-------|-------------------------------------------------------------------|-------|
| C34 <sup>f</sup>      | CD150791 | 1 <sup>c</sup> | AP002480 | 1e-14 | aspartic proteinase (BAA02242)                                    | e-104 |
|                       |          | 5              | AC093490 | 3e-99 |                                                                   |       |
| C46 <sup>c,e</sup>    | CD150802 | 2              | AP004063 | 0     | S-adenosylmethionine decarboxylase 2 (CAB64600)                   | 2e-39 |
| C47 <sup>f</sup>      | CD150803 | 1 <sup>c</sup> | AP002482 | 4e-70 | S-adenosyl methionine synthetase (CAA81481)                       | 8e-61 |
|                       |          | 5              | AC087552 | 0     |                                                                   |       |
| C49 <sup>f</sup>      | CD150805 | 10             | AC037425 | e-104 | cytoplasmic malate dehydrogenase (AAG13573)                       | 7e-66 |
| C61 <sup>c,f</sup>    | CD150817 | 8              | AP005416 | e-51  | glycolate oxidase (AAB82143)                                      | 3e-53 |
| C62 <sup>g</sup>      | CD150818 | 5              | AC135929 | e-110 | ferrochelatase (BAA22284)                                         | e-119 |
| C63 <sup>f</sup>      | CD150819 | 1              | AP003370 | 5e-88 | putative cinnamyl-alcohol dehydrogenase (BAB90130)                | 3e-87 |
| C79 <sup>c,g</sup>    | CD150835 | 2              | AP004846 | e-55  | UMP/CMP kinase b (AAF23372)                                       | 4e-47 |
| C107 <sup>c,f</sup>   | CD150863 | 2              | AP004048 | e-111 | inosine monophosphate dehydrogenase (AAG19418)                    | 3e-09 |
| C109 <sup>c,f</sup>   | CD150865 | 8              | AP005544 | 2e-57 | precursor protein (CAA34213)                                      | 2e-61 |
| 2B14 <sup>c,f</sup>   | CD150877 | 11             | AC123525 | 6e-38 | aspartate kinase-homoserine dehydrogenase (BAA11417)              | 0.027 |
| 1A04 <sup>e</sup>     | CD150880 | 6              | AP005750 | 9e-93 | phytoene synthase (AAK07734)                                      | 2e-41 |
| 2A17 <sup>a,c,f</sup> | CD150893 | 4              | AL606687 | 0     | putative prolyl endopeptidase (BAB78619)                          | 3e-56 |
| 1D14 <sup>e</sup>     | CD150903 | 1              | AP003228 | 6e-73 | cysteine synthase (AAD23909)                                      | 7e-41 |
| 2C14 <sup>f</sup>     | CD150904 | 2              | AP005056 | 6e-67 | protein phosphatase 2b regulatory subunit-like protein (BAB01109) | 2e-52 |

|                     |          |    |          |       |                                                        |       |
|---------------------|----------|----|----------|-------|--------------------------------------------------------|-------|
| 3C13 <sup>c,f</sup> | CD150905 | 6  | AP004322 | 7e-48 | 3-dehydroquinase synthase-like protein (BAB10417)      | 2e-39 |
| 3C04 <sup>f</sup>   | CD150913 | 10 | AC025907 | 9e-56 | ubiquitin-conjugating enzyme E2 (BAB84382)             | 2e-10 |
| 1D06 <sup>c,e</sup> | CD150921 | 6  | AP004697 | e-107 | sucrose synthase (CAA78747)                            | 5e-48 |
| 2F05 <sup>b,f</sup> | CD150963 | 2  | AP004091 | 9e-68 | cellobiose dehydrogenase (AAC26221)                    | 4.2   |
| 3E17 <sup>f</sup>   | CD150968 | 3  | AP090882 | e-102 | putative dehydratase/deaminase (AAL58211)              | 0.002 |
| 1H02 <sup>e</sup>   | CD150972 | 2  | AP004079 | 8e-64 | putative protein kinase (BAB16918)                     | 5e-07 |
| 1H15 <sup>c,e</sup> | CD150989 | 2  | AP004838 | e-120 | OsPK4 (BAA83688)                                       | 0.025 |
| 1A10 <sup>e</sup>   | CD151180 | 11 | AC128643 | e-125 | OsCDPK7 (BAB16888)                                     | 7e-35 |
| 1C13 <sup>a,e</sup> | CD150901 |    |          |       | putative protein kinase (AAM15298)                     | 5.5   |
| 1G14 <sup>c,e</sup> | CD150977 | 2  | AP005513 | e-110 | similar to ferredoxin-thioredoxin reductase (BAB09560) | 0.001 |
| 3G03 <sup>f</sup>   | CD150986 | 4  | AL606457 | 0     | oxidoreductase, zinc-binding (AAO58657)                | 1.9   |
| 2H06 <sup>f</sup>   | CD151003 | 7  | AP004051 | 2e-24 | nucleoside diphosphate kinase (BAA03798)               | e-17  |
| 3J14 <sup>f</sup>   | CD151028 | 10 | AC105932 | e-174 | putative ubiquitin-conjugating enzyme (AAN04972)       | e-45  |
| 3I04 <sup>c,f</sup> | CD151034 | 8  | AP005544 | e-98  | precursor protein (CAA34213)                           | e-81  |
| 3J16 <sup>f</sup>   | CD285458 | 3  | AC117988 | 6e-64 | serine hydroxymethyltransferase (AAL33594)             | e-80  |
| 3J18 <sup>c,f</sup> | CD151047 | 2  | AP005070 | e-49  | adenosine kinase (BAC02723)                            | 2e-69 |
| 2K02 <sup>f</sup>   | CD151049 | 8  | AP005487 | e-108 | threonyl-tRNA synthetase (CAC79651)                    | e-21  |

|                     |          |    |          |       |                                                                            |       |
|---------------------|----------|----|----------|-------|----------------------------------------------------------------------------|-------|
| 2L01 <sup>c,f</sup> | CD151050 | 2  | AP005536 | e-159 | MFDR (BAB79228)                                                            | e-34  |
| 1L14 <sup>c,e</sup> | CD151057 | 1  | AP003225 | 7e-89 | similar to carboxypeptidase D precursor (BAB08188)                         | e-29  |
| 1K03 <sup>c,e</sup> | CD151064 | 2  | AP004071 | e-103 | aspartate--tRNA ligase-like protein (CAB79836)                             | 2e-50 |
| 2K04 <sup>c,f</sup> | CD151065 | 2  | AP004071 | 2e-45 | putative aspartate-tRNA ligase (AAN41339)                                  | e-23  |
| 3K03 <sup>b,f</sup> | CD151067 | 5  | AC079022 | e-142 | putative 3-beta hydroxysteroid dehydrogenase /isomerase protein (AAK73149) | 2e-72 |
| 1L15 <sup>e</sup>   | CD151071 | 7  | AP005098 | 9e-26 | kinase associated protein phosphatase (AAC26828)                           | e-46  |
| 2K16 <sup>c,f</sup> | CD151074 | 3  | AC091494 | 2e-81 | phosphoglucose isomerase (BAA08148)                                        | e-51  |
| 2L15 <sup>c,f</sup> | CD151075 | 6  | AP003946 | 0     | peptidylprolyl isomerase (CAA60505)                                        | 4e-64 |
| 1K05 <sup>a,e</sup> | CD151078 | 1  | AP003277 | e-15  | 2-hydroxy-6-oxo-6-phenylhexa-2,4-dienoate hydrolase (BAA18939)             | 8.2   |
| 3K18 <sup>b,f</sup> | CD151091 | 5  | AC073405 | 2e-58 | similar to peptidyl-prolylcis-trans isomerase (AAG03106)                   | 5e-36 |
| 2M02 <sup>f</sup>   | CD151094 | 5  | AC134341 | 4e-36 | fructose-6-phosphate-2-kinase/fructose-2,6-bisphosphatase (AAL66023)       | 3e-47 |
| 3M01 <sup>f</sup>   | CD151096 | 4  | AL731582 | e-135 | beta-glucosidase (AAN01354)                                                | e-39  |
| 1M13 <sup>a,e</sup> | CD151098 |    |          |       | putative PNGase (peptide N-glycanase) (BAC07101)                           | 1.3   |
| 2M14 <sup>c,f</sup> | CD151103 | 12 | AL731889 | 2e-82 | methionine synthase (AAL33589)                                             | e-64  |
| 1M04 <sup>e</sup>   | CD151109 | 6  | AP005763 | 5e-82 | putative mitogen-activated protein kinase (BAB63546)                       | 6e-41 |

|                     |          |                |          |       |                                                       |       |
|---------------------|----------|----------------|----------|-------|-------------------------------------------------------|-------|
| 2N16 <sup>f</sup>   | CD151118 | 12             | AL731881 | 3e-49 | thiosulfate sulfurtransferase (AAD19957)              | 4e-37 |
| 1M05 <sup>c,e</sup> | CD151122 | 12             | AL731889 | 2e-88 | cysteine synthase (AAD23907)                          | 2e-70 |
| 1N05 <sup>c,e</sup> | CD151123 | 2              | AP004096 | e-58  | putative serine carboxypeptidase (AAL73563)           | 2e-33 |
| 2M05 <sup>f</sup>   | CD151124 | 6              | AP002542 | e-152 | putative transketolase (BAB19388)                     | 4e-63 |
| 3O14 <sup>c,f</sup> | CD151142 | 2              | AP005315 | 0     | putative wall-associated kinase 1 (AAL76192)          | e-14  |
| 2N14 <sup>c,f</sup> | CD151105 | 4              | AL731597 | e-165 | putative wall-associated kinase 1 (AAL76192)          | e-24  |
| 1E05 <sup>e</sup>   | CD150958 | 4 <sup>c</sup> | AL663016 | 0     | putative wall-associated kinase 2 (BAB40021)          | 5e-23 |
|                     |          | 5 <sup>b</sup> | AC118287 | 0     |                                                       |       |
| 2O01 <sup>c,f</sup> | CD151135 | 4              | AL663016 | e-180 | putative wall-associated kinase 2 (AAK98689)          | 2e-13 |
| 3P14 <sup>f</sup>   | CD151143 | 2              | AP005609 | e-64  | putative 2-cys peroxiredoxin protein (AAG41453)       | e-53  |
| 2O16 <sup>f</sup>   | CD151150 | 5              | AC119288 | e-64  | long hypothetical mucD (BAB65932)                     | 5e-05 |
| 3P16 <sup>c,f</sup> | CD151153 | 2              | AP004875 | e-105 | spermidine synthase 1 (CAB61629)                      | 2e-72 |
| 1P05 <sup>c,e</sup> | CD151155 | 1              | AP003048 | e-173 | cytosolic aldehyde dehydrogenase (BAA96794)           | 8e-32 |
| 2O17 <sup>f</sup>   | CD151167 | 4              | AL606645 | 0     | T-protein (CAA81081)                                  | 7e-59 |
| 3O18 <sup>f</sup>   | CD151169 | 3              | AC136284 | 6e-63 | putative GTPase (BAB61154)                            | 2e-12 |
| 1B07 <sup>c,e</sup> | CD151172 | 1              | AP002480 | e-120 | similar to aspartic proteinase precursor (BAA96578)   | e-20  |
| 2A09 <sup>c,f</sup> | CD151181 | 7              | AP004274 | 2e-50 | cytosolic copper/zinc-superoxide dismutase (AAC14465) | 3e-63 |

|                       |          |    |          |       |                                                                               |       |
|-----------------------|----------|----|----------|-------|-------------------------------------------------------------------------------|-------|
| 3A09 <sup>c,f</sup>   | CD151184 | 2  | AP004996 | 2e-57 | aminopeptidase M (AAN41401)                                                   | 7e-48 |
| 1A12 <sup>e</sup>     | CD151192 | 1  | AP003535 | 9e-70 | dTDP-glucose 4-6-dehydratase-like protein (AAL65400)                          | 2e-39 |
| 1B11 <sup>e</sup>     | CD151193 | 4  | AL606641 | 4e-67 | putative phosphomannomutase (AAC28545)                                        | e-43  |
| 3B23 <sup>f</sup>     | CD151198 | 7  | AP003835 | 6e-97 | putative tryptophan synthase IBMlike protein (AAC78257)                       | 6e-36 |
| 3C08 <sup>c,f</sup>   | CD151204 | 1  | AP003443 | e-119 | putative seryl-tRNA synthetase (BAB85392)                                     | e-65  |
| 2D19 <sup>f</sup>     | CD151208 | 1  | AP003281 | e-95  | putative DNA-dependent ATPase(BAB64747)                                       | e-88  |
| 1D09 <sup>b,e</sup>   | CD151214 | 3  | AC099399 | e-47  | putative serine acetyltransferase (AAN05506)                                  | e-39  |
| 2C10 <sup>a,b,f</sup> | CD151217 | 5  | AC130606 | 9e-29 | similar to Spinacia oleracea protein kinase (BAB03409)                        | 4e-18 |
| 3C09 <sup>f</sup>     | CD151218 | 8  | AP003919 | 2e-62 | putative phosphoribosylaminoimidazolecarboxamide formyltransferase (AAM14072) | 9e-45 |
| 1C11 <sup>b,e</sup>   | CD151223 | 12 | AL954158 | e-147 | alpha keto-acid dehydrogenase alpha subunit (AAC69851)                        | e-23  |
| 3F22 <sup>f</sup>     | CD151257 | 10 | AC051632 | 5e-82 | putative aminotransferase (AAM67247)                                          | 7e-26 |
| C23 <sup>c,g</sup>    | CD150780 | 12 | AL731739 | 4e-86 | ribulose 1,5-bisphosphate carboxylase small subunit (AAB70544)                | 1e-36 |
| 3C02 <sup>c,f</sup>   | CD150899 | 12 | AL731739 | 2e-59 | small subunit of ribulose-1,5-bisphosphate carboxylase (BAA00538)             | 5e-34 |
| 3G19 <sup>c,f</sup>   | CD151279 | 12 | AL731739 | 0     | ribulose 1,5-bisphosphate carboxylase small subunit (AAB70544)                | 6e-14 |

|                       |          |                |          |       |                                                                                        |       |
|-----------------------|----------|----------------|----------|-------|----------------------------------------------------------------------------------------|-------|
| 3C14 <sup>f</sup>     | CD150906 | 1 <sup>c</sup> | AP003280 | e-142 | ribulose 1,5-bisphosphate carboxylase large subunit                                    | 5e-46 |
|                       |          | 6              | AP004236 | e-142 | (AAA85330)                                                                             |       |
|                       |          | 10             | AC092750 | e-142 |                                                                                        |       |
| C24 <sup>c,g</sup>    | CD150781 | 12             | AL731739 | 2e-62 | ribulose 1,5-bisphosphate carboxylase (AAA84592)                                       | 8e-34 |
| 1G09 <sup>c,e</sup>   | CD151280 | 1              | AP003924 | 4e-41 | asparaginyl endopeptidase (BAB85400)                                                   | 4e-31 |
| 3G12 <sup>c,f</sup>   | CD151296 | 8              | AP003928 | 0     | cysteine endopeptidase (BAB92565)                                                      | 3e-14 |
| 1G24 <sup>e</sup>     | CD151297 | 5              | AC135915 | e-135 | putative signal peptidase subunit (BAC20617)                                           | 0.47  |
| 2G23 <sup>f</sup>     | CD151300 | 5              | AC134931 | 3e-80 | isovaleryl-CoA dehydrogenase (CAC08233)                                                | e-45  |
| 1J19 <sup>c,e</sup>   | CD151309 | 1              | AP002903 | e-134 | maturase (AAM92654)                                                                    | 0.83  |
| 1H20 <sup>e</sup>     | CD151277 | 3              | AC096690 | 6e-84 | maturase (BAB91175)                                                                    | 7.7   |
| 2I20 <sup>f</sup>     | CD151310 | 6              | AP004234 | e-36  | putative 2-phospho-D-glycerate hydrolyase (AAN04181)                                   | 5e-45 |
| 2J10 <sup>f</sup>     | CD151315 | 7              | AP004342 | 3e-29 | putative alanine aminotransferase (BAC20747)                                           | e-22  |
| 1J11 <sup>c,e</sup>   | CD151325 | 9              | AC108762 | 3e-42 | putative cinnamyl-alcohol dehydrogenase (BAB90130)                                     | 2.2   |
| 2K07 <sup>a,e</sup>   | CD151341 | 7              | AP003956 | 8e-49 | putative NAD-dependent malic enzyme 62 KDA isoform, mitochondrial precursor (BAC21378) | 3e-13 |
| 3K08 <sup>f</sup>     | CD151344 | 6              | AP004008 | 7e-82 | putative Pro-X carboxypeptidase homolog (BAC10762)                                     | 3e-23 |
| 3L20 <sup>a,c,f</sup> | CD151352 | 4              | AL606687 | 6e-93 | putative prolyl endopeptidase (BAB78619)                                               | 7e-14 |
| 2L10 <sup>f</sup>     | CD151358 |                |          |       | alpha-N-acetylglucosaminidase (CAA77084)                                               | 2e-53 |

|                       |          |    |          |       |                                                       |       |
|-----------------------|----------|----|----------|-------|-------------------------------------------------------|-------|
| C1 <sup>c,f</sup>     | CD150758 | 3  | AC118132 | e-132 | cytoplasmic aconitate hydratase (AAD25640)            | 5e-54 |
| 2K22 <sup>c,f</sup>   | CD151366 | 1  | AP003212 | 8e-75 | putative acyl-CoA synthetase (BAC01252)               | 4e-41 |
| 2L22 <sup>a,c,f</sup> | CD151368 | 4  | AL606687 | 2e-75 | putative prolyl endopeptidase (BAB78619)              | 2e-09 |
| 3K21 <sup>b,f</sup>   | CD151369 | 5  | AC093490 | 0     | aspartic proteinase (BAA02242)                        | 3e-27 |
| 2K11 <sup>f</sup>     | CD151372 | 3  | AC134234 | 5e-91 | putative phosphoenolpyruvate carboxykinase (AAM18765) | 6e-41 |
| 3K24 <sup>a,c,f</sup> | CD151379 | 6  | AP004806 | 2e-31 | cysteine synthase (AAD23910)                          | 3e-10 |
| 3L24 <sup>c,f</sup>   | CD151380 | 1  | AP003709 | e-114 | NADP-specific isocitrate dehydrogenase (BAB90451)     | 5e-53 |
| 1N07 <sup>c,e</sup>   | CD151383 | 1  | AP003254 | 0     | NPK1-related protein kinase-like protein (BAB64166)   | 3e-78 |
| 3M20 <sup>b,f</sup>   | CD151395 | 7  | AP003954 | 4e-25 | calcium-dependent protein kinase (BAC20693)           | 5e-11 |
| 3N20 <sup>c,f</sup>   | CD151396 | 1  | AP002818 | e-161 | putative C-8,7 sterol isomerase (BAB92148)            | 8e-30 |
| 3M24 <sup>f</sup>     | CD151420 | 5  | AC134929 | 3e-61 | very similar to prenyl transferase (AAD50025)         | e-44  |
| 2O07 <sup>f</sup>     | CD151422 | 8  | AP005159 | 3e-45 | putative apyrase (AAL82534)                           | 3e-07 |
| 1O20 <sup>c,e</sup>   | CD151426 | 12 | AL731889 | 3e-81 | methionine synthase protein (AAL73979)                | 4e-81 |
| 3O22 <sup>c,f</sup>   | CD151443 | 2  | AP005286 | 2e-64 | S-adenosylmethionine decarboxylase 2 (CAB64600)       | 2e-22 |
| 2P11 <sup>b,f</sup>   | CD151446 | 3  | AC134886 | 0     | putative auxin-regulated cytosolic kinase (BAC16492)  | 5e-19 |
| 2P24 <sup>c,f</sup>   | CD151451 | 8  | AP003884 | 3e-54 | putative GMP synthase (BAC22314)                      | 5e-27 |
| C14 <sup>c,f</sup>    | CD150771 | 1  | AP003344 | 0     | tylactone synthase starter module (AAB66504)          | 6e-01 |



|                     |          |    |          |       |                                                                          |       |
|---------------------|----------|----|----------|-------|--------------------------------------------------------------------------|-------|
| 1J01 <sup>c,e</sup> | CD151011 | 12 | AL513005 | 8e-47 | pyruvate kinase-like (AAM25747)                                          | 2e-33 |
| C51 <sup>c,f</sup>  | CD150807 | 1  | AP003924 | 0     | asparaginyl endopeptidase (BAA84650)                                     | e-27  |
| 3D18 <sup>f</sup>   | CD150932 |    |          |       | similar to O-linked GlcNAc transferases (AAM65399)                       | 4e-54 |
| 2J12 <sup>a,f</sup> | CD151329 |    |          |       | NADH dehydrogenase I, M subunit (AAK23913)                               | 2.3   |
| 2H14 <sup>c,f</sup> | CD150980 | 8  | AP004213 | 7e-10 | cytochrome c oxidase, subunit II (AAK25369)                              | 3.2   |
| 1K21 <sup>e</sup>   | CD151362 | 2  | AP004187 | 5e-30 | ferredoxin-NADP+ reductase (BAA04616)                                    | e-09  |
| 2M15 <sup>f</sup>   | CD151116 | 10 | AC079029 | 5e-30 | putative gibberellin oxidase (AAN92286)                                  | 2e-50 |
| 2E22 <sup>a,f</sup> | CD151254 |    |          |       | putative alanine aminotransferase (BAC20747)                             | 7e-08 |
| C32 <sup>c,f</sup>  | CD150789 | 1  | AP003368 | e-171 | putative acyl-CoA: 1-acylglycerol-3-phosphate acyltransferase (BAB92544) | e-111 |
| 2A01 <sup>c,f</sup> | CD150870 | 4  | AL662964 | 2e-68 | putative subtilase (BAB89065)                                            | 7e-24 |
| 3D06 <sup>c,f</sup> | CD150925 | 1  | AP002901 | e-111 | homoserine kinase (CAB72618)                                             | 9.2   |
| 1J13 <sup>c,e</sup> | CD151021 | 1  | AP004331 | e-172 | similar to cdc2 protein kinase (AAF87863)                                | 2.5   |
| 3L01 <sup>c,f</sup> | CD151053 | 1  | AP003409 | 5e-50 | transketolase (NP_335945)                                                | 6.4   |
| 1K06 <sup>e</sup>   | CD151079 | 1  | AP003200 | e-167 | casein kinase-like protein (BAB56099)                                    | 4e-25 |
| 1H06 <sup>c,e</sup> | CD150999 | 3  | AC090713 | 5e-85 | casein kinase II alpha subunit (BAB21589)                                | 2e-71 |
| 1O17 <sup>e</sup>   | CD151163 | 6  | AP001389 | 0     | similar to iron superoxide dismutase (BAA92737)                          | e-21  |

|                       |          |    |          |       |                                                                                 |       |
|-----------------------|----------|----|----------|-------|---------------------------------------------------------------------------------|-------|
| 3E21 <sup>c,f</sup>   | CD151256 | 1  | AP003855 | e-104 | carbonic anhydrase 3 (AAD56038)                                                 | 9e-63 |
| 3P23 <sup>f</sup>     | CD151454 | 10 | AC060755 | 2e-71 | putative adenosine kinase (AAK00437)                                            | 9e-07 |
| 1C10 <sup>e</sup>     | CD151213 | 8  | AP004885 | 0     | putative glucan synthase (AAD31571)                                             | 5.2   |
| 2P19 <sup>a,f</sup>   | CD151430 |    |          |       | NADP-malate dehydrogenase (AAA87008)                                            | 2e-04 |
| 2L24 <sup>c,f</sup>   | CD151378 | 1  | AP003411 | e-41  | putative 2,3-bisphosphoglycerate independent phosphoglycerate mutase (BAB64833) | e-25  |
| 2M08 <sup>a,c,f</sup> | CD151386 | 6  | AP002536 | 7e-50 | prolyl aminopeptidase-like protein (CAB71084)                                   | 3e-28 |
| 1N19 <sup>c,e</sup>   | CD151392 | 3  | AC118132 | 9e-05 | aconitase-iron regulated protein 1 (AAC26045)                                   | 7e-07 |
| 2N10 <sup>f</sup>     | CD151403 | 1  | AP004365 | e-147 | putative uridylate kinase (BAC05612)                                            | e-47  |
| 2P08 <sup>c,f</sup>   | CD151423 | 2  | AP005772 | 4e-73 | putative cytochrome P450 monooxygenase (AAK20054)                               | 8e-07 |
| 3B02 <sup>f</sup>     | CD150873 | 10 | AC027038 | e-133 | putative glutamine synthetase (AAN05527)                                        | 4e-47 |
| 1O06 <sup>e</sup>     | CD151154 | 7  | AP005831 | e-139 | acetolactate synthase III large subunit (ilvI) (AAC23233)                       | 0.37  |
| 3E12 <sup>f</sup>     | CD151262 | 3  | AC134234 | 0     | putative phosphoenolpyruvate carboxykinase (AAL86512)                           | e-09  |
| 1O10 <sup>a,e</sup>   | CD151433 | 2  | AP005394 | 6e-38 | mutT domain protein-like (BAA97158)                                             | 3e-18 |
| C90 <sup>g</sup>      | CD150846 | 8  | AP004375 | 4e-70 | putative alpha-galactosidase preproprotein (AAM92832)                           | 8.6   |
| 3K12 <sup>c,f</sup>   | CD151376 | 3  | AC084767 | 0     | putative chelatase subunit (AAK72264)                                           | 5e-68 |
| 2C04 <sup>f</sup>     | CD150910 | 2  | AP004187 | e-86  | hydroxypyruvate reductase (HPR) (AAM20404)                                      | 5e-26 |

|                     |          |    |          |       |                                                                            |       |
|---------------------|----------|----|----------|-------|----------------------------------------------------------------------------|-------|
| 1E04 <sup>e</sup>   | CD150946 |    |          |       | related to type 2C protein phosphatase (CAB91227)                          | 8.9   |
| 2G06 <sup>f</sup>   | CD151001 | 2  | AP004187 | e-11  | NADH-dependent hydroxypyruvate reductase (CAA41434)                        | 1.6   |
| 1I05 <sup>c,e</sup> | CD151036 | 8  | AP004190 | e-124 | putative mitochondrial RNA helicase (AAK71567)                             | 7.5   |
| 1L16 <sup>e</sup>   | CD151072 | 5  | AC136219 | 3e-10 | putative aspartate-tRNA ligase (AAN41339)                                  | e-23  |
| 1N17 <sup>a,e</sup> | CD151127 |    |          |       | aminoDAHP synthase (AAC01718)                                              | 2.8   |
| 3A21 <sup>f</sup>   | CD151190 | 11 | AC138197 | e-124 | similar to alpha-xylosidase precursor (BAA99366)                           | 6.4   |
| 2G02 <sup>c,f</sup> | CD150973 | 2  | AP005323 | e-117 | putative cytosolic monodehydroascorbate reductase (AAL87166)               | e-90  |
| 2C24 <sup>f</sup>   | CD151231 | 11 | AC123527 | 3e-90 | putative type IIB calcium ATPase (BAB89725)                                | e-45  |
| 1H19 <sup>c,e</sup> | CD151276 | 1  | AP003346 | 9e-53 | putative ATP-dependent Clp protease regulatory subunit CLPX (BAC00633)     | 3e-84 |
| 1O23 <sup>c,e</sup> | CD151449 | 1  | AP002903 | e-150 | putative aspartate transaminase (BAB63467)                                 | 8e-72 |
| C11 <sup>b,f</sup>  | CD150768 | 3  | AC134769 | e-116 | ATP-dependent protease proteolytic subunit (AAM60971)                      | 6e-14 |
| 2F02 <sup>b,f</sup> | CD150937 | 4  | AL731639 | e-97  | ATP-dependent protease (CD4A) (AAA34160)                                   | 8e-06 |
| 3K16 <sup>f</sup>   | CD151076 | 3  | AC118670 | 2e-68 | putative 3-beta hydroxysteroid dehydrogenase /isomerase protein (AAK73149) | 2e-72 |
| 2H21 <sup>c,f</sup> | CD151288 | 2  | AP005846 | 0     | phospho-beta-glucosidase (AAC05714)                                        | 9     |
| 1L08 <sup>c,e</sup> | CD151340 | 1  | AP003411 | e-62  | putative 2,3-bisphosphoglycerate-independent                               | e-46  |

|                           |          |   |          |       |                                                                  |       |
|---------------------------|----------|---|----------|-------|------------------------------------------------------------------|-------|
|                           |          |   |          |       | phosphoglycerate mutase (BAB62580)                               |       |
| 2P09 <sup>c,f</sup>       | CD151436 | 1 | AP003727 | 5e-81 | putative sphingosine-1-phosphate lyase (BAB62623)                | 3e-37 |
| 2L02 <sup>c,f</sup>       | CD151051 | 1 | AP003264 | e-167 | NADH dehydrogenase ND6 (CAA33908)                                | 9e-46 |
| 2H11 <sup>a,f</sup>       | CD151293 |   |          |       | citrate synthase (AAL01662)                                      | 1.4   |
| 3M10 <sup>f</sup>         | CD151404 | 8 | AP004667 | 0     | iron-sulfur binding reductase, degenerate (AAL64320)             | 9.4   |
| 2J07 <sup>a,f</sup>       | CD151305 |   |          |       | citrate synthase (AAL01663)                                      | 7.8   |
| C74 <sup>f</sup>          | CD150830 |   |          |       | Membrane-associated histidine kinase with HAMP domain (AAK81442) | 2.1   |
| 1K09 <sup>a,e</sup>       | CD151353 |   |          |       | putative exonuclease (AAO63566)                                  | 5.8   |
| <b>Singnal transducer</b> |          |   |          |       |                                                                  |       |
| C29 <sup>c,f</sup>        | CD150786 | 8 | AP004704 | e-33  | putative ER lumen retaining receptor (AAM63347)                  | 6e-64 |
| C31 <sup>c,e</sup>        | CD150788 | 1 | AP003264 | 0     | putative tubby-like protein (BAB93319)                           | 6e-91 |
| 3E03 <sup>c,f</sup>       | CD150950 | 5 | AP005619 | e-119 | signal recognition particle subunit 9 (CAA71203)                 | 9e-15 |
| 2P06 <sup>c,f</sup>       | CD151159 | 8 | AP005493 | 2e-66 | putative signal recognition particle protein (AAK93679)          | 3e-29 |
| 3O19 <sup>c,f</sup>       | CD151431 | 1 | AP003265 | 4e-13 | putative signal recognition particle 54K protein (BAB89854)      | e-20  |
| 2E06 <sup>c,f</sup>       | CD150962 | 1 | AP003250 | e-131 | putative receptor serine/threonine kinase (BAB64146)             | 4e-50 |
| 2H16 <sup>f</sup>         | CD150994 | 6 | AP004685 | 7e-12 | putative serine/threonine protein kinase (BAB63697)              | 0.057 |

|                            |          |    |          |       |                                                                           |       |
|----------------------------|----------|----|----------|-------|---------------------------------------------------------------------------|-------|
| 1H22 <sup>e</sup>          | CD151287 | 4  | AL606686 | 5e-63 | putative serine/threonine protein kinase (AAM52323)                       | 5e-16 |
| 2M07 <sup>f</sup>          | CD151385 | 6  | AP003621 | e-112 | MAP kinase homolog (AAF23902)                                             | e-29  |
| 3G09 <sup>b,f</sup>        | CD151284 | 5  | AC087551 | 3e-37 | tumor necrosis factor receptor 2 related protein (AAA36757)               | 1.8   |
| 3F12 <sup>f</sup>          | CD151263 | 11 | AC121328 | 0     | receptor protein kinase-like protein (BAC20627)                           | 6e-17 |
| C69 <sup>a,e</sup>         | CD150825 |    |          |       | receptor kinase-like protein (AAC49123)                                   | 0.61  |
| 3H24 <sup>f</sup>          | CD151303 | 10 | AC074283 | 3e-80 | putative receptor-like protein kinase 4 (AAK02023)                        | 2e-83 |
| 1C19 <sup>a,c,e</sup>      | CD151207 | 1  | AP003431 | 0     | putative S-receptor kinase (BAB92653)                                     | e-20  |
| 3J06 <sup>c,f</sup>        | CD151043 | 1  | AP003338 | 0     | receptor-like kinase (AAF78019)                                           | 2e-86 |
| 3O06 <sup>c,f</sup>        | CD151161 | 1  | AP002747 | 0     | putative receptor kinase (BAB17344)                                       | 9e-79 |
| 3E15 <sup>c,f</sup>        | CD150956 | 2  | AP004778 | 0     | growth factor-regulated tyrosine kinase substrate-like protein (AAL58181) | 2e-29 |
| 1D11 <sup>e</sup>          | CD151224 | 3  | AC125496 | 0     | putative vacuolar sorting receptor protein (AAN05373)                     | 3e-63 |
| 2B05 <sup>f</sup>          | CD150889 | 7  | AP005181 | 4e-21 | putative vacuolar sorting receptor protein (AAN05373)                     | 2e-62 |
|                            |          | 10 | AC079634 | 0     |                                                                           |       |
| 3P09 <sup>a,c,f</sup>      | CD151439 | 9  | AC108756 | e-139 | sensory transduction histidine kinase (BAA17045)                          | 0.3   |
| <b>Structural molecule</b> |          |    |          |       |                                                                           |       |
| C5 <sup>f</sup>            | CD150762 |    |          |       | ribosomal protein S7 (AAN04468)                                           | 1e-83 |
| 3M13 <sup>c,f</sup>        | CD151106 | 8  | AP003884 | 5e-73 | ribosomal protein L7A (BAA02156)                                          | 3e-70 |

|                     |          |   |          |       |                                                   |       |
|---------------------|----------|---|----------|-------|---------------------------------------------------|-------|
| C25 <sup>f</sup>    | CD150782 | 7 | AP003827 | e-156 | ribosomal protein (BAC15877)                      | 2e-39 |
| 2G05 <sup>c,f</sup> | CD151000 | 1 | AP004672 | 0     | ribosomal protein L27 precursor (AAC05674)        | 3e-13 |
| C83 <sup>f</sup>    | CD150839 | 2 | AP004053 | e-61  | 60S ribosomal protein L14 (AAM62673)              | e-52  |
| 3C10 <sup>c,f</sup> | CD151219 | 2 | AP005612 | e-119 | putative 60S ribosomal protein (BAB91757)         | 3e-59 |
| 1N08 <sup>e</sup>   | CD151384 | 5 | AC129718 | 4e-38 | putative 60S ribosomal protein L30 (BAB90388)     | 7e-19 |
| 3L05 <sup>f</sup>   | CD151084 | 7 | AP003827 | 9e-09 | putative 60S ribosomal protein L44 (BAC15877)     | 8e-10 |
| 3A13 <sup>f</sup>   | CD150878 | 7 | AP003759 | e-110 | putative 60S ribosomal protein (BAC06940)         | 3e-13 |
| 1J23 <sup>c,e</sup> | CD151332 | 1 | AP003232 | e-122 | putative 50S ribosomal protein L34 (BAB92266)     | e-14  |
| 1J16 <sup>c,e</sup> | CD151035 | 3 | AC092075 | e-149 | 40S ribosomal protein S6 (BAC10193)               | 3e-50 |
| 2E17 <sup>f</sup>   | CD150967 | 7 | AP005764 | e-135 | putative 40S ribosomal protein S12 (BAC20920)     | 3e-38 |
| 2C03 <sup>f</sup>   | CD150909 | 3 | AC134230 | e-135 | chloroplast ribosomal protein S1 (AAA34045)       | 3e-39 |
| 3N15 <sup>c,f</sup> | CD151121 | 8 | AP004562 | e-100 | cytoplasmatic ribosomal protein S13 (CAA44311)    | 2e-69 |
| C78 <sup>e</sup>    | CD150834 | 1 | AP003270 | 0     | actin (CAA33872)                                  | 2e-74 |
| 2P13 <sup>a,f</sup> | CD151141 |   |          |       | alpha tubulin (CAA77988)                          | 3e-09 |
| 2N15 <sup>f</sup>   | CD151117 | 7 | AP003845 | 8e-99 | alpfa tubulin (CAA77988)                          | e-30  |
| <b>Transporter</b>  |          |   |          |       |                                                   |       |
| C15 <sup>b,f</sup>  | CD150772 | 5 | AC105259 | 1e-15 | putative triose phosphate translocator (BAB17213) | 4e-80 |

|                     |          |                 |          |       |                                                                     |       |
|---------------------|----------|-----------------|----------|-------|---------------------------------------------------------------------|-------|
| C55 <sup>e</sup>    | CD150811 |                 |          |       | plasma intrinsic protein (AA039008)                                 | 2.1   |
| 1D03 <sup>c,e</sup> | CD150907 | 1               | AP003311 | 8e-07 | putative peptide transporter (AAG46153)                             | e-27  |
|                     |          | 4               | AL607004 | 0     |                                                                     |       |
| 2D18 <sup>f</sup>   | CD150929 | 3               | AC116604 | 2e-70 | putative peroxisomal Ca-dependent solute carrier protein (BAB16462) | 0.099 |
| 3E02 <sup>f</sup>   | CD150938 | 4               | AL662996 | 2e-46 | putative calcium-transporting ATPase (AAM08790)                     | 9e-08 |
| 3E13 <sup>f</sup>   | CD150944 | 3               | AC128647 | e-78  | H <sup>+</sup> -ATPase (AAA68175)                                   | 7e-19 |
|                     |          | 11 <sup>b</sup> | AC120526 | e-78  |                                                                     |       |
| 1F04 <sup>c,e</sup> | CD150948 | 1               | AP003300 | e-51  | putative vacuolar ATP synthase subunit d (BAB89911)                 | 2e-63 |
| 1I18 <sup>e</sup>   | CD151044 | 12              | AL772427 | e-115 | putative permease 1 (BAB61205)                                      | 3e-21 |
| 3L14 <sup>f</sup>   | CD151061 | 2               | AC069158 | e-108 | putative ABC transporter (AAK98701)                                 | 4e-75 |
| 2P17 <sup>f</sup>   | CD151168 | 12              | AL513003 | 5e-05 | putative ABC transporter (AAC98048)                                 | 2.3   |
| 1M12 <sup>e</sup>   | CD151412 | 9               | AP005129 | e-155 | putative ABC transporter (AAM18755)                                 | e-32  |
| 2L06 <sup>f</sup>   | CD151083 | 4               | AL662970 | 2e-90 | MgATP-energized glutathione S-conjugate pump (AAC04246)             | 6e-44 |
| 1L17 <sup>c,e</sup> | CD151086 | 1               | AP003300 | e-54  | voltage-dependent anion channel (CAC80851)                          | 2e-54 |
| 2D07 <sup>c,f</sup> | CD151202 | 9               | AP005508 | e-112 | voltage-dependent anion channel (CAB82853)                          | 2e-70 |
| 1C21 <sup>c,e</sup> | CD151220 | 8               | AP004592 | 4e-32 | anthocyanin-related membrane protein 1 (BAB70612)                   | e-12  |

|                       |          |    |          |       |                                                                                    |       |
|-----------------------|----------|----|----------|-------|------------------------------------------------------------------------------------|-------|
| 1E07 <sup>c,e</sup>   | CD151233 | 3  | AC073556 | 0     | sodium-dependent high affinity glutamate transporter GLT-1A (AAG13411)             | 0.51  |
| 1G08 <sup>c,e</sup>   | CD151269 | 7  | AP004570 | 0     | putative potassium transporter (CAD20997)                                          | e-44  |
| 3G08 <sup>c,f</sup>   | CD151274 | 6  | AB023482 | e-105 | syntaxin of plants SYP132 (NP_568187)                                              | 6e-39 |
| 1L20 <sup>c,e</sup>   | CD151347 | 4  | AL606454 | 0     | putative cyclic nucleotide and calmodulin-regulated ion channel protein (AAK16188) | 3e-18 |
| 1M07 <sup>e</sup>     | CD151381 | 10 | AC073391 | e-22  | putative phosphate transporter OsPT1 (AAN39042)                                    | e-19  |
| 2O20 <sup>f</sup>     | CD151429 | 4  | AL606656 | e-121 | putative glucose-6-phosphate tranlocator (BAB41206)                                | 2e-07 |
| 3C19 <sup>b,f</sup>   | CD151209 | 3  | AC135207 | e-143 | chloroplast import-associated channel homolog (CAB51191)                           | 5e-72 |
| 1M08 <sup>e</sup>     | CD151382 | 4  | AL663010 | e-127 | putative iron-phytosiderophore transporter protein (BAB68117)                      | 8e-07 |
| 1B16 <sup>c,e</sup>   | CD150882 | 1  | AP003311 | e-158 | putative peptide transport protein (BAB16458)                                      | 0.004 |
| 3B16 <sup>f</sup>     | CD150884 | 1  | AP002953 | e-129 | putative SecA-type chloroplast protein transport factor (BAB21229)                 | 7e-50 |
| C86 <sup>c,f</sup>    | CD150842 | 1  | AP004330 | e-150 | SecY-independent transporter protein (AAM96630)                                    | 2.7   |
| <b>Other function</b> |          |    |          |       |                                                                                    |       |
| 1G03 <sup>e</sup>     | CD150981 | 1  | AP003213 | e-131 | putative ARG1 protein (Altered Response to Gravity) (BAB32957)                     | 6e-45 |
| 1D23 <sup>c,e</sup>   | CD151230 | 8  | AP005505 | e-168 | germin-like protein 2 precursor (AAD43972)                                         | e-73  |



|                     |          |    |          |       |                                                                                           |       |
|---------------------|----------|----|----------|-------|-------------------------------------------------------------------------------------------|-------|
| 3E23 <sup>c,f</sup> | CD151266 | 1  | AP003047 | e-143 | gigantea homologue(CAB56058)                                                              | 9e-65 |
| 2K19 <sup>f</sup>   | CD151348 | 9  | AP006149 | e-143 | Tcte-1 peptide (AAA40406)                                                                 | 1.2   |
| 1L09 <sup>a,e</sup> | CD151355 |    |          |       | T69 (AAK57113)                                                                            | 2.4   |
| 2N23 <sup>a,f</sup> | CD151419 |    |          |       | immunoglobulin heavy chain variable region (AAL16964)                                     | 0.86  |
| C96 <sup>c,e</sup>  | CD150852 | 1  | AP003727 | 5e-88 | putative light-regulated protein (BAB64256)                                               | 6e-37 |
| C105 <sup>c,e</sup> | CD150861 | 8  | AP003917 | e-171 | kinesin-like protein (CAB75639)                                                           | 1.3   |
| 3A19 <sup>c,f</sup> | CD151178 | 10 | AC069300 | 3e-98 | keratin reading frame (CAA24214)                                                          | 6.5   |
| C2 <sup>c,f</sup>   | CD150759 | 2  | AP004770 | 4e-67 | kinesin heavy chain-like protein (BAC15970)                                               | 3.7   |
| 3I15 <sup>c,f</sup> | CD285457 | 7  | AP004300 | 2e-60 | putative TGF (transforming growth factor) beta inducible nuclear protein TINP1 (BAC16002) | e-21  |
| 1P13 <sup>a,e</sup> | CD151139 |    |          |       | capsid protein VP1 (AAD17737)                                                             | 5.5   |
| 1F20 <sup>b,e</sup> | CD151240 | 5  | AC093952 | 9e-50 | rev interacting protein-like (BAB89130)                                                   | 7e-56 |
| 1F19 <sup>e</sup>   | CD151239 | 10 | AC024129 | e-55  | required for meiotic nuclear division (NP_683716)                                         | 0.99  |
| 3F20 <sup>c,f</sup> | CD151244 | 8  | AP003886 | e-143 | large T antigen (CAB59361)                                                                | 3.4   |
| 3E24 <sup>f</sup>   | CD151267 | 11 | AC108871 | e-179 | putative ring finger protein (AAG46117)                                                   | 5.3   |
| 1G11 <sup>c,e</sup> | CD151291 | 1  | AP002522 | 3e-76 | putative ppf-1 protein (BAB03614)                                                         | 9e-18 |
| 3I12 <sup>c,f</sup> | CD151330 | 4  | AL606692 | e-114 | oryzain alpha precursor (BAA14402)                                                        | 0.003 |

|                     |          |    |          |       |                                                   |       |
|---------------------|----------|----|----------|-------|---------------------------------------------------|-------|
| 2M21 <sup>b,f</sup> | CD151406 | 5  | AC084817 | e-85  | thioredoxin h-like protein (AAN63618)             | e-15  |
| 2H22 <sup>c,f</sup> | CD151289 | 4  | AL606687 | 5e-97 | thioredoxin-like protein (CAB64225)               | 0.69  |
| 1N02 <sup>e</sup>   | CD151093 | 6  | AP003633 | e-29  | thioredoxin M (CAA06736)                          | 9e-04 |
| 1G15 <sup>e</sup>   | CD150988 | 1  | AP003853 | e-180 | LEC14B like-protein (BAB84486)                    | 5e-04 |
| 1N11 <sup>e</sup>   | CD151413 | 7  | AP005175 | e-82  | Pseudomonas inducible protein (BAB93255)          | 4e-13 |
| 3C22 <sup>b,f</sup> | CD151222 | 3  | AC084406 | 0     | putative thiamin biosynthesis protein (AAK21630)  | e-101 |
| 3B14 <sup>c,f</sup> | CD150879 | 8  | AP005528 | 2e-77 | TnpX (AAB51419)                                   | 1.5   |
| 2M17 <sup>a,f</sup> | CD151129 |    |          |       | radical fringe protein (AAD10827)                 | 7.7   |
| 2O13 <sup>c,f</sup> | CD151140 | 3  | AC084406 | e-164 | putative thiamin biosynthesis protein (AAK26130)  | 2e-69 |
| 3O08 <sup>f</sup>   | CD151425 | 5  | AC130601 | 7e-88 | saline responsive OSSRIII protein (AAM00365)      | e-12  |
| 1A17 <sup>e</sup>   | CD150891 | 10 | AC079888 | 0     | putative glycine-rich protein (AAM93675)          | 2e-23 |
| 1N14 <sup>e</sup>   | CD151101 | 11 | AC125782 | e-86  | putative BLE2 protein (BAC20049)                  | 4.5   |
| 1H10 <sup>e</sup>   | CD151282 | 11 | AC109594 | e-165 | similar to amelogenin precursor (BAC20669)        | 2e-19 |
| 3J02 <sup>c,f</sup> | CD151019 | 9  | AP005811 | 4e-74 | putative apospory-associated protein C (AAL87174) | 2e-11 |
| C64 <sup>f</sup>    | CD150820 | 6  | AP003628 | 3e-53 | hyuC-like protein (CAB79007)                      | 3e-35 |
| 3C18 <sup>f</sup>   | CD150931 | 8  | AP005520 | 2e-60 | wound inducive gene (BAA95791)                    | 3e-57 |
| 2C22 <sup>f</sup>   | CD151221 | 6  | AP004739 | 0     | similar to wound-repressed gene (X59883)          | 1.7   |

|                       |          |                |          |       |                                                                         |       |
|-----------------------|----------|----------------|----------|-------|-------------------------------------------------------------------------|-------|
| 2E09 <sup>f</sup>     | CD151248 | 10             | AC068951 | e-139 | putative stress inducible protein (AAM93720)                            | 7.3   |
| 1F24 <sup>e</sup>     | CD151265 | 2              | AP004078 | 8e-68 | cold shock protein-like (BAB89228)                                      | 9e-09 |
| C37 <sup>a,e</sup>    | CD150794 |                |          |       | temperature stress-induced lipocalin (AAL75812)                         | 0.41  |
| 3N23 <sup>a,c,f</sup> | CD151421 | 1              | AP003924 | e-143 | similar to membrane-associated salt-inducible protein isolog (BAB85394) | 3e-47 |
| 3C06 <sup>f</sup>     | CD150924 | 4              | AL606651 | e-155 | putative membrane-associated salt-inducible protein (AAM91881)          | 4e-22 |
| 2A18 <sup>f</sup>     | CD150894 |                |          |       | similar to putative argonaute protein (BAA88176)                        | 3e-58 |
| 3K07 <sup>f</sup>     | CD151343 | 11             | AC134924 | e-48  | putative dormancy-associated protein (AAL78369)                         | e-12  |
| 2C09 <sup>f</sup>     | CD151216 | 11             | AC134924 | 2e-80 | putative dormancy-associated protein(AAL78369)                          | 6e-30 |
| 3M07 <sup>f</sup>     | CD151389 | 7              | AP004315 | e-141 | putative light-regulated protein (BAB64256)                             | 3e-07 |
| 1B06 <sup>e</sup>     | CD150887 | 9              | AP005568 | e-168 | putative senescence-associated protein (AAG13616)                       | 0.002 |
| C57 <sup>c,f</sup>    | CD150813 | 7              | AP004308 | 0     | senescence-associated putative protein (BAC16013)                       | 2e-98 |
| 3A12 <sup>f</sup>     | CD151196 | 4 <sup>c</sup> | AL731605 | e-130 | ORF16-lacZ fusion protein synthetic construct (AAA72562)                | 8e-07 |
|                       |          | 7              | AP005543 | e-130 |                                                                         |       |
|                       |          | 10             | AC074232 | e-130 |                                                                         |       |
| 1J15 <sup>c,e</sup>   | CD285455 | 1              | AP003343 | e-135 | similar to phytochrome A supressor (BAB90064)                           | e-28  |
| C98 <sup>f</sup>      | CD150854 | 8              | AP004375 | 2e-74 | ICAM-4 (AAG30953)                                                       | 9.2   |

|                       |          |                 |          |       |                                                            |       |
|-----------------------|----------|-----------------|----------|-------|------------------------------------------------------------|-------|
| C102 <sup>f</sup>     | CD150858 | 1 <sup>c</sup>  | AP003255 | 8e-18 | similar to transposon MuDR mudrA protein isolog (BAA92402) | 8e-09 |
|                       |          | 12 <sup>c</sup> | AL928756 | e-109 |                                                            |       |
| C53 <sup>f</sup>      | CD150809 | 7               | AP005197 | 3e-43 | ADP-ribosylation factor 1 (AAB65432)                       | 2e-60 |
| C54 <sup>a,f</sup>    | CD150810 |                 |          |       | ADP-ribosylation factor 1 (AAB65432)                       | 4e-71 |
| 2K20 <sup>b,f</sup>   | CD151349 | 3               | AC092262 | e-171 | prostate specific antigen (CAA51957)                       | 0.36  |
| 2C11 <sup>c,f</sup>   | CD151226 | 6               | AP004758 | e-128 | ACP76 (AAG38157)                                           | 9.4   |
| 1F08 <sup>e</sup>     | CD151235 | 2               | AP004053 | e-137 | minor capsid protein (AAC13831)                            | 5.4   |
| 2I13 <sup>a,b,f</sup> | CD151022 | 4               | AL663006 | e-103 | putative cytochrome b-561 (AAG13625)                       | 2e-18 |
| 1E01 <sup>a,e</sup>   | CD150933 | 1               | AP003277 | 6e-80 | P32 ADHESIN (P32_MYCGA)                                    | 4.2   |
| 1F14 <sup>e</sup>     | CD150942 | 8               | AP004764 | 4e-49 | calcineurin-like protein (AAL25650)                        | 2e-48 |
| 3B10 <sup>f</sup>     | CD151186 | 6               | AP005769 | 2e-94 | putative glutaredoxin (NP_197550)                          | 8e-26 |
| 1A21 <sup>e</sup>     | CD151187 | 5               | AC119288 | 2e-83 | KED (EAA20695)                                             | 9.9   |
| 1F03 <sup>a,c,e</sup> | CD150947 | 4               | AL606628 | e-161 | transcriptional antiterminator (NP_347983)                 | 3.8   |
| 1O14 <sup>e</sup>     | CD151138 | 1               | AP003240 | 0     | Os-FIERG2 gene product (AAC04628)                          | 6e-27 |
| 1K10 <sup>e</sup>     | CD151354 | 6               | AP006050 | 0     | triadin 95kDa (TRISK 95) (CAB64604)                        | 4e-02 |
| C104 <sup>c,f</sup>   | CD150860 | 2               | AP005651 | 2e-85 | putative terminal ear1 (BAB92568)                          | 2e-11 |
| 2E10 <sup>c,f</sup>   | CD151249 | 12              | AL713945 | 0     | polyprotein (AAK13116)                                     | 2e-36 |

|                         |          |    |          |       |                                                        |       |
|-------------------------|----------|----|----------|-------|--------------------------------------------------------|-------|
| 3K10 <sup>f</sup>       | CD151360 | 9  | AP005590 | e-105 | NOI protein (AAB86939)                                 | 3e-43 |
| 2J22 <sup>c,f</sup>     | CD151322 | 11 | AC109832 | 2e-69 | putative flower development regulator (BAB92482)       | 0.7   |
| 2B20 <sup>f</sup>       | CD151177 | 3  | AC104487 | 2e-88 | c-fps proto oncogene (CAA26155)                        | 1.6   |
| 2N08 <sup>b,f</sup>     | CD151388 | 4  | AL732350 | 3e-74 | putative syringolide-induced protein 1-3-1B (BAC05661) | 0.003 |
| 2N01 <sup>a,f</sup>     | CD151095 |    |          |       | DNA-damage inducible protein DDI1-like (BAB02792)      | 5e-04 |
| <b>Unknown function</b> |          |    |          |       |                                                        |       |
| 3K19 <sup>f</sup>       | CD151351 | 2  | AP005285 | 5e-36 | unknown protein (AAL32687)                             | 2e-14 |
| 3G23 <sup>c,f</sup>     | CD151302 | 3  | AC092557 | 6e-98 | unknown protein (BAC20822)                             | 2e-13 |
| C20 <sup>c,e</sup>      | CD150777 | 10 | AC025783 | 2e-99 | unknown protein (AAK20043)                             | 1e-41 |
| 3J24 <sup>b,f</sup>     | CD151336 | 3  | AC104473 | e-160 | unknown protein (AAN60995)                             | 5e-49 |
| C80 <sup>g</sup>        | CD150836 | 1  | AP003206 | e-149 | unknown protein (BAB19776)                             | 6.3   |
| C82 <sup>c,f</sup>      | CD150838 | 1  | AP003274 | 4e-73 | unknown protein (BAB61223)                             | 5e-63 |
| C84 <sup>c,e</sup>      | CD150840 | 8  | AP004256 | 2e-37 | unknown protein (AAG51760)                             | 2e-10 |
| 1L13 <sup>e</sup>       | CD151056 | 3  | AC135206 | 0     | unknown protein (AAP06861)                             | 5e-48 |
| 2F06 <sup>f</sup>       | CD150964 | 9  | AP005093 | 3e-08 | unknown protein (AAG48777)                             | 9e-06 |
| 1G04 <sup>c,e</sup>     | CD150982 | 8  | AP005501 | 2e-39 | unknown protein (BAC16048)                             | 5e-31 |
| 2I01 <sup>f</sup>       | CD151013 | 11 | AC135794 | 0     | unknown protein (AAL34158)                             | 8e-15 |

|                       |          |    |          |       |                            |       |
|-----------------------|----------|----|----------|-------|----------------------------|-------|
| 2J20 <sup>a,c,f</sup> | CD151311 | 1  | AP003022 | 7e-59 | unknown protein(BAB78652)  | 9e-39 |
| 2L14 <sup>b,f</sup>   | CD151058 | 5  | AC113333 | 0     | unknown protein (BAB84370) | 2e-04 |
| 1L06 <sup>c,e</sup>   | CD151080 | 8  | AP005174 | e-121 | unknown protein (AAM65090) | e-07  |
| 3O16 <sup>c,f</sup>   | CD151152 | 3  | AC084320 | e-105 | unknown protein (AAK09242) | 3e-55 |
| 3O05 <sup>f</sup>     | CD151160 | 9  | AP005729 | e-163 | unknown protein (AAG51412) | 2e-10 |
| 3A24 <sup>f</sup>     | CD151197 | 1  | AP003077 | e-179 | unknown protein (BAB92188) | 5e-71 |
| 3P10 <sup>c,f</sup>   | CD151440 | 3  | AC134236 | 2e-72 | unknown protein (BAA90811) | 7e-57 |
| 3O12 <sup>a,c,f</sup> | CD151447 | 2  | AP005297 | 3e-81 | unknown protein (AAL85020) | 2e-15 |
| 3I08 <sup>f</sup>     | CD151307 | 7  | AP004348 | 7e-62 | unknown protein (AAK76598) | 3e-19 |
| 1H13 <sup>e</sup>     | CD150978 | 3  | AC136136 | 0     | unknown protein (AAK52530) | 9e-09 |
| 3K13 <sup>f</sup>     | CD151059 | 4  | AL606656 | 2e-30 | unknown protein (AAM91116) | 2e-57 |
| 1P20 <sup>e</sup>     | CD151427 | 11 | AC123521 | e-81  | unknown protein (AAF34415) | e-10  |
| 2L19 <sup>f</sup>     | CD151350 | 8  | AP005569 | 8e-33 | unknown protein (AAK26041) | 2e-05 |
| 3N21 <sup>c,f</sup>   | CD151411 | 1  | AP003631 | 0     | unknown protein (BAB64214) | 3e-33 |
| C72 <sup>g</sup>      | CD150828 | 6  | AP001168 | e-104 | unknown protein (BAA90811) | 3e-28 |
| 2C06 <sup>f</sup>     | CD150922 | 2  | AP004884 | e-178 | unknown protein (AAM10230) | 2e-29 |
| C81 <sup>c,f</sup>    | CD150837 | 1  | AP003342 | e-123 | unknown protein (BAB64688) | 6e-33 |

|                     |          |                |          |       |                            |       |
|---------------------|----------|----------------|----------|-------|----------------------------|-------|
| 1M18 <sup>e</sup>   | CD151126 | 6              | AP001129 | e-121 | unknown protein (BAB09074) | 3e-07 |
| 3M17 <sup>f</sup>   | CD151132 | 12             | AL731761 | 2e-49 | unknown protein (AAK0277)  | 0.55  |
| C4 <sup>g</sup>     | CD150761 | 6              | AP005395 | e-120 | unknown protein (AAM20140) | 0.022 |
| 2I14 <sup>b,f</sup> | CD151023 | 12             | AL928753 | 7e-79 | unknown protein (AAM91187) | 5e-35 |
| C43 <sup>c,f</sup>  | CD150799 | 6              | AP003575 | e-128 | unknown protein (BAB84363) | 0.2   |
| 3I10 <sup>f</sup>   | CD151316 | 3              | AC079633 | e-128 | unknown protein (AAK92637) | 2e-94 |
| 3I23 <sup>c,f</sup> | CD151333 | 2              | AP004026 | 2e-72 | unknown protein (BAC20692) | 2e-11 |
| 3K09 <sup>f</sup>   | CD151359 | 11             | AC108872 | 2e-40 | unknown protein (AAL31050) | 9.7   |
| 1K22 <sup>e</sup>   | CD151363 | 1              | AP002953 | 9e-59 | unknown protein (BAB21237) | e-78  |
| C89 <sup>f</sup>    | CD150845 | 12             | AL844497 | 0     | unknown protein (BAB64818) | 0.4   |
| C59 <sup>f</sup>    | CD150815 | 3              | AC119748 | e-144 | unknown protein (BAB32914) | 3e-15 |
| C6 <sup>a,f</sup>   | CD150763 | 12             | AL731761 | e-175 | unknown protein (BAB40160) | 4e-04 |
| 2A07 <sup>c,f</sup> | CD151173 | 4              | AL662959 | 4e-97 | unknown protein (AAM64480) | e-17  |
| C75 <sup>b,f</sup>  | CD150831 | 11             | AC109644 | 0     | unknown protein (AAM91163) | 7e-07 |
| 1B13 <sup>c,e</sup> | CD150874 | 8              | AP005485 | 4e-83 | unknown protein (AAM13377) | 8e-46 |
| 2A05 <sup>f</sup>   | CD150888 | 1 <sup>c</sup> | AP002818 | 1e-37 | unknown protein (BAB16327) | 2e-22 |
|                     |          | 2              | AP004094 | 2e-46 |                            |       |

|                     |          |    |          |       |                            |       |
|---------------------|----------|----|----------|-------|----------------------------|-------|
| 1D04 <sup>e</sup>   | CD150908 | 1  | AP003286 | e-141 | unknown protein (BAB89804) | e-53  |
| 2H04 <sup>b,f</sup> | CD150985 | 12 | AL731888 | e-102 | unknown protein (AAL47395) | 7e-42 |
| 2J05 <sup>b,f</sup> | CD151040 | 5  | AC130605 | e-105 | unknown protein (BAB90687) | 3e-48 |
| 2M20 <sup>b,f</sup> | CD151393 | 12 | AL928753 | e-147 | unknown protein (AAL32684) | 8e-26 |
| 1N13 <sup>e</sup>   | CD151100 | 6  | AP004685 | e-101 | unknown protein (BAB21288) | 5.9   |
| 2O15 <sup>b,f</sup> | CD151149 | 3  | AC103550 | e-119 | unknown protein (AAM61342) | 8e-13 |
| 3A17 <sup>c,f</sup> | CD150895 | 1  | AP003215 | e-61  | unknown protein(BAB62566)  | 3e-94 |
| 3P18 <sup>c,f</sup> | CD151170 | 8  | AP003886 | 5e-92 | unknown protein (AAG43284) | 3     |
| 2O02 <sup>c,f</sup> | CD151136 | 1  | AP003215 | 0     | unknown protein (BAB62566) | e-28  |
| 3O20 <sup>f</sup>   | CD151432 | 1  | AP003213 | 5e-82 | unknown protein (BAB60914) | 3e-69 |
| 2B10 <sup>c,f</sup> | CD151183 | 4  | AL731594 | 9e-32 | unknown protein (BAB93356) | 0.04  |
| 3C20 <sup>c,f</sup> | CD151210 | 4  | AL606450 | 5e-87 | unknown protein (BAB19385) | 2     |
| C66 <sup>c,f</sup>  | CD150822 | 2  | AP005286 | 5e-59 | unknown protein (BAB90754) | 6.9   |
| C48 <sup>f</sup>    | CD150804 | 4  | AL606652 | 0     | unknown protein (AAF26988) | e-57  |
| 2E19 <sup>c,f</sup> | CD151241 | 12 | AL928756 | e-110 | unknown protein (AAG29199) | 4e-31 |
| C106 <sup>c,f</sup> | CD150862 | 1  | AP001278 | e-143 | unknown protein (BAA92191) | e-61  |
| 1P09 <sup>c,e</sup> | CD151434 | 1  | AP003222 | e-161 | unknown protein(BAB63547)  | 2e-45 |



|                       |          |    |          |       |                               |       |
|-----------------------|----------|----|----------|-------|-------------------------------|-------|
| 3N13 <sup>c,f</sup>   | CD151107 | 2  | AP004045 | e-161 | unknown protein (BAB62549)    | 4e-25 |
| 2O06 <sup>f</sup>     | CD151158 | 10 | AC060755 | e-110 | unknown protein (AAK00450)    | 5e-68 |
| 3E19 <sup>f</sup>     | CD151243 | 3  | AC092852 | 2e-38 | unknown protein (AAF01597)    | 4e-39 |
| C108 <sup>c,f</sup>   | CD150864 | 2  | AP005284 | e-152 | unknown protein (AAF99850)    | 3e-25 |
| 1H24 <sup>e</sup>     | CD151299 | 1  | AP003269 | 0     | unknown protein (BAB89702)    | 2e-87 |
| 3G01 <sup>c,f</sup>   | CD150974 | 8  | AP003883 | e-82  | unknown protein (AAG51005)    | 3.3   |
| 3E08 <sup>c,f</sup>   | CD151237 | 2  | AP004880 | e-123 | unknown protein (BAB86267)    | 0.082 |
| 2D08 <sup>c,f</sup>   | CD151203 | 1  | AP002913 | 0     | unknown protein (BAB21196)    | 5e-76 |
| 1G06 <sup>c,e</sup>   | CD150997 | 1  | AP002819 | e-133 | unknown protein (BAB21076)    | 1.8   |
| 2J02 <sup>a,c,f</sup> | CD151016 | 3  | AC093018 | 3e-46 | unknown protein (BAB09499)    | 5e-16 |
| C88 <sup>b,f</sup>    | CD150844 | 10 | AC025906 | 0     | unknown protein (AAM97139)    | e-04  |
| C93 <sup>f</sup>      | CD150849 | 9  | AP005093 | 4e-73 | unknown protein (AAG48777)    | 7e-45 |
| C94 <sup>c,f</sup>    | CD150850 | 1  | AP003380 | e-124 | unknown protein (BAB92570)    | e-26  |
| C101 <sup>c,f</sup>   | CD150857 | 4  | AL606635 | e-129 | unknown protein (AAL38843)    | 0.5   |
| 1N10 <sup>e</sup>     | CD151399 | 9  | AP004756 | e-159 | unknown protein (AAH12978)    | 8.7   |
| 2M09 <sup>c,f</sup>   | CD151400 | 8  | AP004566 | 3e-86 | expressed protein (NP_563819) | 7.2   |
| 3O23 <sup>a,f</sup>   | CD151452 | 6  | AP004324 | e-118 | expressed protein (AAM97130)  | 0.026 |

|                       |          |   |          |       |                                                            |       |
|-----------------------|----------|---|----------|-------|------------------------------------------------------------|-------|
| 3P11 <sup>c,f</sup>   | CD151448 | 1 | AP003264 | 9e-64 | similar to Arabidopsis protein (BAB84384)                  | 5e-20 |
| 3A11 <sup>c,f</sup>   | CD151195 | 3 | AC104321 | 2e-96 | unnamed protein product (BAA01746)                         | 8e-43 |
| 1A01 <sup>a,e</sup>   | CD150868 | 6 | AP003708 | 2e-35 | unnamed protein product (BAA92402)                         | 9e-09 |
| 1H17 <sup>a,c,e</sup> | CD151005 | 1 | AP003416 | 5e-78 | unnamed protein product (BAC03523)                         | 9     |
| 2D02 <sup>f</sup>     | CD150898 | 6 | AP003614 | 0     | unnamed protein product (BAC04446)                         | 5.7   |
| 3P05 <sup>c,f</sup>   | CD151162 | 8 | AP004158 | 3e-87 | EST (AAF18495)                                             | 2e-41 |
| 1L18 <sup>e</sup>     | CD151087 | 5 | AC120988 | e-149 | contains ESTs AU032194 (R3678)                             | 3e-16 |
| 2F15 <sup>f</sup>     | CD150955 |   |          |       | rice callus and differential tissue SSH library (CA882810) | 4e-08 |
| 2J14 <sup>f</sup>     | CD151025 |   |          |       | rice callus and differential tissue SSH library (CA882810) | 4e-08 |
| 2N21 <sup>a,f</sup>   | CD151408 | 4 | AL606587 | 8e-73 | hypothetical protein (BAB64131)                            | 8     |
| 1O01 <sup>e</sup>     | CD151134 | 4 | AL662938 | e-149 | hypothetical protein(BAB39959)                             | 3.5   |
| 2J13 <sup>a,f</sup>   | CD151024 |   |          |       | hypothetical protein (NP_701391)                           | 5.1   |
| 1G17 <sup>e</sup>     | CD151004 | 6 | AP004792 | e-131 | hypothetical protein (BAB19353)                            | 5e-39 |
| 1H07 <sup>c,e</sup>   | CD151270 | 1 | AP003260 | e-113 | hypothetical protein (BAB89638)                            | e-06  |
| 3G07 <sup>c,f</sup>   | CD151273 | 1 | AP002819 | e-117 | hypothetical protein (BAB21095)                            | e-38  |
| 2J01 <sup>f</sup>     | CD151015 | 3 | AC099324 | 6e-79 | hypothetical protein (BAC07353)                            | 3e-05 |
| 3G15 <sup>f</sup>     | CD150995 | 6 | AP004008 | e-128 | hypothetical protein (BAC16185)                            | 2e-18 |

|                     |          |                |          |       |                                 |       |
|---------------------|----------|----------------|----------|-------|---------------------------------|-------|
| C110 <sup>c,f</sup> | CD150866 | 3              | AC113930 | e-109 | hypothetical protein (BAB03354) | 7e-15 |
| 3I03 <sup>f</sup>   | CD151033 | 9              | AP005587 | 0     | hypothetical protein (BAB32904) | 3e-06 |
| 1H11 <sup>c,e</sup> | CD151292 | 4              | AL606443 | e-25  | hypothetical protein (BAC09397) | 5e-21 |
| 1E12 <sup>c,e</sup> | CD151258 | 3              | AC134237 | 0     | hypothetical protein (AAF97333) | 3e-33 |
| C91 <sup>g</sup>    | CD150847 | 4 <sup>c</sup> | AL662978 | 0     | hypothetical protein (AAF09840) | e-21  |
|                     |          | 8              | AP005161 | 0     |                                 |       |
|                     |          | 10             | AC074232 | 0     |                                 |       |
| C17 <sup>c,f</sup>  | CD150774 | 2              | AP004780 | e-158 | hypothetical protein (BAB93348) | 5e-25 |
| 2N11 <sup>c,f</sup> | CD151414 | 4              | AL662977 | e-105 | hypothetical protein (AAC18791) | 3e-58 |
| C56 <sup>e</sup>    | CD150812 | 3              | AC096688 | 3e-96 | hypothetical protein (AAO20074) | 7e-36 |
| 1P18 <sup>e</sup>   | CD151166 | 1              | AP003275 | 6e-30 | hypothetical protein (BAB63647) | e-12  |
| 1B19 <sup>e</sup>   | CD151176 | 7              | AP003842 | e-66  | hypothetical protein (BAC07394) | 2e-09 |
| 2A10 <sup>f</sup>   | CD151182 | 3              | AC118133 | e-142 | hypothetical protein (BAB90735) | e-28  |
| 2O22 <sup>c,f</sup> | CD151442 | 2              | AP004683 | 0     | hypothetical protein (AAF09603) | 2.7   |
| 2B15 <sup>c,f</sup> | CD150883 | 4              | AL606639 | e-07  | hypothetical protein (BAB74351) | 0.14  |
| 2O12 <sup>f</sup>   | CD151445 | 4              | AL606646 | e-91  | hypothetical protein (AAK63939) | 3e-15 |
| 3O24 <sup>f</sup>   | CD151453 | 7              | AP004342 | 6e-29 | hypothetical protein (AAD15333) | 3.1   |
| 1C24 <sup>a,e</sup> | CD151229 |                |          |       | hypothetical protein(BAB90376)  | 0.051 |

|                        |          |    |          |       |                                  |       |
|------------------------|----------|----|----------|-------|----------------------------------|-------|
| C77 <sup>a,g</sup>     | CD150833 | 10 | AC077693 | 2e-66 | hypothetical protein (AAL86488)  | 9e-12 |
| 1H16 <sup>c,e</sup>    | CD150990 | 4  | AL606639 | 6e-40 | hypothetical protein (BAB89426)  | 0.26  |
| 1D18 <sup>b,e</sup>    | CD150927 | 5  | AC135924 | e-125 | hypothetical protein (BAB39994)  | 5.1   |
| 2F22 <sup>a,f</sup>    | CD151255 |    |          |       | hypothetical protein (AAD17018)  | 1.7   |
| 2E16 <sup>f</sup>      | CD150954 | 4  | AL606638 | e-154 | hypothetical protein (BAA95856)  | 6.1   |
| 2I12 <sup>c,f</sup>    | CD151327 | 6  | AP004844 | 0     | hypothetical protein (BAC19994)  | 2.2   |
| 1J04 <sup>c,e</sup>    | CD151030 | 3  | AC135958 | 0     | hypothetical protein AAF00631)   | 5e-08 |
| C70 <sup>c,e</sup>     | CD150826 | 1  | AP003374 | e-157 | hypothetical protein (BAB93320)  | e-91  |
| 3C15 <sup>f</sup>      | CD150919 | 7  | AP005253 | 6e-21 | hypothetical protein (BAB90608)  | 4e-06 |
| 3C23 <sup>a,f</sup>    | CD151232 |    |          |       | hypothetical protein (NP_207520) | 1.8   |
| 3K14 <sup>a, c,f</sup> | CD151060 | 2  | AP005408 | e-120 | hypothetical protein (CAB67212)  | 0.003 |
| 3F04 <sup>c,f</sup>    | CD150952 | 6  | AB023482 | e-118 | hypothetical protein (AAM18729)  | 0.002 |
| 2M13 <sup>a,c,f</sup>  | CD151102 | 1  | AP003371 | e-121 | hypothetical protein (BAC03303)  | 7e-17 |
| 3D02 <sup>a,f</sup>    | CD150900 | 9  | AP005129 | 0     | hypothetical protein (CAB66527)  | 5.7   |
| 3D04 <sup>f</sup>      | CD150914 | 3  | AC119748 | 7e-79 | hypothetical protein (AAK18935)  | 8.1   |
| 2D03 <sup>c,f</sup>    | CD150911 | 9  | AP005700 | e-109 | hypothetical protein (BAB90100)  | 4e-17 |
| 1E13 <sup>e</sup>      | CD150940 | 1  | AP004613 | 0     | hypothetical protein (BAC00735)  | 3e-50 |

|                     |          |    |          |       |                                 |       |
|---------------------|----------|----|----------|-------|---------------------------------|-------|
| 1M16 <sup>c,e</sup> | CD151115 | 11 | BX000493 | 4e-61 | hypothetical protein (BAC10781) | 3.6   |
| 3E16 <sup>f</sup>   | CD150957 | 7  | AP005149 | e-127 | hypothetical protein (BAC07009) | e-04  |
| 3I24 <sup>c,f</sup> | CD151334 | 4  | AL606639 | 3e-59 | hypothetical protein (AAN06867) | 3     |
| 1K19 <sup>e</sup>   | CD151346 | 9  | AP005583 | e-174 | hypothetical protein (BAB91951) | 3.9   |
| 3G21 <sup>c,f</sup> | CD151290 | 12 | AL731756 | 8e-91 | hypothetical protein (BAC16678) | 2e-06 |
| 2J11 <sup>c,f</sup> | CD151328 | 8  | AP005411 | e-105 | hypothetical protein (BAB78679) | 0.05  |
| 1L07 <sup>a,e</sup> | CD151339 | 10 | AC122144 | e-140 | hypothetical protein (AAM44892) | e-73  |
| 3M18 <sup>c,f</sup> | CD151133 | 2  | AP005002 | 6e-45 | hypothetical protein(BAB63758)  | 6e-32 |
| 2I21 <sup>f</sup>   | CD151321 | 1  | AP002971 | e-102 | hypothetical protein (BAB39295) | 2e-39 |
| 1C15 <sup>e</sup>   | CD150915 | 2  | AP004865 | 0     | hypothetical protein (AAM91877) | 7e-11 |
| 2J17 <sup>a,f</sup> | CD151046 |    |          |       | hypothetical protein (BAB84384) | 3e-45 |
| 3L16 <sup>f</sup>   | CD151077 | 7  | AP005438 | 0     | hypothetical protein (BAB19409) | 0.62  |
| 1F13 <sup>a,e</sup> | CD150941 |    |          |       | hypothetical protein (CAB73811) | 4.7   |
| 2E20 <sup>c,f</sup> | CD151242 | 3  | AC105733 | e-124 | hypothetical protein (BAC07022) | 3.5   |
| C28 <sup>f</sup>    | CD150785 | 6  | AP003711 | 0     | hypothetical protein (BAB68048) | 2e-09 |
| 2F07 <sup>b,f</sup> | CD151236 | 12 | AL773425 | e-143 | hypothetical protein (F86312)   | 4e-08 |
| 3I22 <sup>f</sup>   | CD151323 | 6  | AP001389 | 3e-44 | hypothetical protein (BAA92723) | 7e-12 |

|                       |          |    |          |       |                                 |       |
|-----------------------|----------|----|----------|-------|---------------------------------|-------|
| 1K08 <sup>e</sup>     | CD151338 | 7  | AP004572 | e-94  | hypothetical protein (EAA17960) | 2.7   |
| 3E11 <sup>f</sup>     | CD151261 |    |          |       | hypothetical protein (AAO51658) | 1.8   |
| 2E21 <sup>c,f</sup>   | CD151253 | 12 | AL928756 | 2e-57 | hypothetical protein (H86163)   | 0.15  |
| 3F05 <sup>c,f</sup>   | CD150965 | 8  | AP004460 | 3e-28 | hypothetical protein (AAL86488) | 0.002 |
| 2L18 <sup>a,c,f</sup> | CD151090 | 2  | AP004776 | 6e-32 | hypothetical protein (BAB85388) | e-06  |
| 2M04 <sup>b,f</sup>   | CD151111 | 12 | AL731890 | e-127 | hypothetical protein(CAC09512)  | 3e-17 |
| C111 <sup>e</sup>     | CD150867 | 8  | AP004375 | e-118 | hypothetical protein (BAB16924) | e-16  |
| 2B01 <sup>f</sup>     | CD150871 | 1  | AP003238 | e-66  | hypothetical protein (BAB63608) | 5e-54 |
| 1G01 <sup>e</sup>     | CD150970 | 5  | AC112160 | e-111 | hypothetical protein (AAC74002) | 2.1   |
| 2G15 <sup>f</sup>     | CD150991 | 6  | AP005459 | 6e-76 | hypothetical protein (CAC39344) | 3     |
| 2J15 <sup>a,f</sup>   | CD285456 |    |          |       | hypothetical protein (AAN36115) | 4.1   |
| C36 <sup>g</sup>      | CD150793 | 2  | AP004865 | 0     | hypothetical protein (BAB63857) | 4.4   |
| 2H05 <sup>a,f</sup>   | CD151002 | 2  | AP004187 | e-11  | hypothetical protein (AAN35847) | 1.2   |
| 1H09 <sup>e</sup>     | CD151281 | 5  | AC093921 | 0     | hypothetical protein (EAA21597) | 0.7   |
| 1G22 <sup>e</sup>     | CD151286 | 9  | AP005971 | e-140 | hypothetical protein (BAA96616) | 4.8   |
| 1D07 <sup>e</sup>     | CD151201 | 3  | AC104179 | 0     | hypothetical protein (AAD17434) | 3e-22 |
| 1B21 <sup>e</sup>     | CD151188 | 10 | AC079029 | e-112 | hypothetical protein (AAM92295) | e-29  |

|                       |          |    |          |       |                                  |       |
|-----------------------|----------|----|----------|-------|----------------------------------|-------|
| 3B24 <sup>f</sup>     | CD151199 | 11 | AC131343 | 4e-84 | hypothetical protein (BAB62625)  | e-39  |
| 3E18 <sup>a,f</sup>   | CD150969 | 10 | AC077693 | 3e-60 | hypothetical protein (AAL86488)  | 0.003 |
| 1P12 <sup>a,e</sup>   | CD151444 |    |          |       | hypothetical protein (AAK39395)  | 0.96  |
| 3N11 <sup>b,f</sup>   | CD151416 | 5  | AC093953 | 3e-96 | hypothetical protein (BAB19346)  | 3.7   |
| 1K07 <sup>a,e</sup>   | CD151337 |    |          |       | hypothetical protein (CAB95446)  | 7.9   |
| 3P03 <sup>a,c,f</sup> | CD151147 | 1  | AP003227 | 8e-83 | hypothetical protein (CAB11146)  | 8.8   |
| 1F23 <sup>a,e</sup>   | CD151264 |    |          |       | hypothetical protein (CAB73811)  | 5.5   |
| C92 <sup>f</sup>      | CD150848 | 9  | AP005710 | e-149 | hypothetical protein (AAM32567)  | 2.2   |
| 2K12 <sup>a,f</sup>   | CD151373 |    |          |       | hypothetical protein (XP_289308) | 1.5   |
| 1O18 <sup>e</sup>     | CD151164 | 7  | AP003835 | 0     | putative polyprotein (AAL31078)  | 4.2   |
| 3M19 <sup>f</sup>     | CD151394 | 9  | AP005551 | 0     | putative protein (CAB89045)      | 0.008 |
| 1M14 <sup>c,e</sup>   | CD151099 | 4  | AC135563 | e-151 | putative protein (CAB68187)      | 2e-20 |
| 1C17 <sup>e</sup>     | CD150926 | 1  | AP002836 | e-121 | putative protein (BAB03425)      | e-31  |
| 3M11 <sup>f</sup>     | CD151415 | 4  | AL606641 | 3e-45 | putative protein (CAA18171)      | e-43  |
| C10 <sup>f</sup>      | CD150767 | 3  | AC126221 | e-119 | putative protein (CAB80629)      | 8e-68 |
| 1J05 <sup>c,e</sup>   | CD151038 | 8  | AP003882 | e-125 | putative protein (CAB82981)      | 3e-37 |
| 3A07 <sup>f</sup>     | CD151174 | 5  | AC129718 | e-137 | putative protein (CAB63015)      | 5e-12 |

|                     |          |    |          |       |                              |       |
|---------------------|----------|----|----------|-------|------------------------------|-------|
| 3L10 <sup>c,f</sup> | CD151361 | 6  | AP004758 | 7e-76 | putative protein (CAB52557)  | 2e-33 |
| 1G21 <sup>c,e</sup> | CD151285 | 12 | AC027133 | e-72  | putative protein (CAB75818)  | 4e-43 |
| 3I14 <sup>a,f</sup> | CD151027 | 6  | AP000391 | 4e-48 | putative protein (CAB81929)  | 3e-25 |
| 1I13 <sup>e</sup>   | CD151020 | 6  | AP001168 | e-112 | putative protein (BAA90807)  | 8e-25 |
| 2I03 <sup>f</sup>   | CD151031 | 1  | AP003104 | e-100 | putative protein (CAB39942)  | 9.7   |
| 3L02 <sup>c,f</sup> | CD151054 | 3  | AC135595 | 0     | OSJNBa0052P16.16 (CAD39512)  | e-25  |
| 3A02 <sup>c,f</sup> | CD150872 | 4  | AL606610 | 2e-59 | OSJNBb0012E08.10 (CAD40786)  | 8e-38 |
| C99 <sup>e</sup>    | CD150855 | 2  | AP005385 | 3e-75 | OJ000223_09.16 (CAD41404)    | e-88  |
| 1B18 <sup>e</sup>   | CD150892 | 4  | AL442115 | e-137 | OSJNBa0029H02.6 (CAD41490)   | 4e-33 |
| 2C01 <sup>c,f</sup> | CD150896 | 4  | AL606592 | e-171 | OSJNBa0006B20.3(CAD40812)    | 4e-63 |
| 1M23 <sup>e</sup>   | CD151417 | 7  | AP005186 | e-45  | OSJNBa0052O21.22 (CAD40037)  | 3.9   |
| C42 <sup>b,f</sup>  | CD150798 | 4  | AL662973 | e-110 | OSJNBb0089K24.13 (CAD39404)  | 0.54  |
| 3C03 <sup>f</sup>   | CD150912 | 4  | AL606615 | 0     | OSJNBa0086B14.21 (CAD40849)  | e-52  |
| C45 <sup>f</sup>    | CD150801 | 4  | AL442115 | 0     | OSJNBa0029H02.13 (CAD41497)  | 2e-85 |
| 2I02 <sup>c,f</sup> | CD151014 | 6  | AP003488 | 2e-89 | OSJNBa0064H22.10 (CAD40865)  | 6e-05 |
| 3J19 <sup>c,f</sup> | CD151312 | 8  | AP004374 | 0     | OSJNBb0011N17.22 (CAD41105)  | 5e-52 |
| 1K18 <sup>b,e</sup> | CD151085 | 3  | AC097279 | 8e-68 | At2g27920/T1E2.16 (AAL06502) | e-06  |



|                     |          |    |          |       |                                                            |       |
|---------------------|----------|----|----------|-------|------------------------------------------------------------|-------|
| 1I19 <sup>c,e</sup> | CD151308 | 2  | AP004063 | e-89  | T23E23.2 (AAF87159)                                        | 2e-21 |
| 1K04 <sup>e</sup>   | CD151062 | 3  | AC092852 | 0     | F1N19.8 (AAF19690)                                         | 4e-37 |
| C103 <sup>f</sup>   | CD150859 | 2  | AP004126 | 3e-84 | oj000126_13.8 (CAD40586)                                   | 2e-55 |
|                     |          | 2  | AP004156 | 6e-24 |                                                            |       |
|                     |          | 2  | AP004851 | 6e-24 |                                                            |       |
| 2P10 <sup>c,f</sup> | CD151437 | 4  | AL606454 | 2e-46 | zhb0018.1 (CAB55426)                                       | 3e-23 |
| 1M19 <sup>e</sup>   | CD151391 | 1  | AP001551 | 8e-71 | corresponding to a region of the predicted gene (BAA92966) | e-66  |
| 1K13 <sup>c,e</sup> | CD151055 | 8  | AP004654 | 2e-69 | CAA303719.1 protein (CAB53492)                             | e-52  |
| 3G18 <sup>c,f</sup> | CD151009 | 9  | AC108760 | e-153 | oj991113_30.14 (CAD41332)                                  | 5.3   |
| 3I13 <sup>b,f</sup> | CD151026 | 5  | AC104277 | 0     | agCP7749 (EAA08901)                                        | 2.7   |
| 2M03 <sup>a,f</sup> | CD151110 | 3  | AC116426 | 4e-11 | P0458A05.18 (BAB19409)                                     | 0.73  |
| 2L07 <sup>c,f</sup> | CD151342 | 8  | AP005505 | e-121 | L3342.4 (AAF70532)                                         | 2.1   |
| 1F18 <sup>e</sup>   | CD150966 | 7  | AP005200 | e-112 | oj000126_13.12 (CAD40590)                                  | 1.8   |
| 2M10 <sup>b,f</sup> | CD151401 | 5  | AC104713 | 0     | CG5249-PA (AAF50759)                                       | 1.6   |
| 3F03 <sup>c,f</sup> | CD150951 | 11 | AC135561 | 2e-71 | P0534A03.6 protein (BAC57718)                              | 7.2   |
| 2K05 <sup>f</sup>   | CD151081 | 4  | AL606633 | 4e-74 | GLP_113_4299_5381 (EAA37074)                               | 7.9   |
| 2D11 <sup>a,f</sup> | CD151227 |    |          |       | C05B5.5 protein (S43572)                                   | 1.3   |
| 3H08 <sup>c,f</sup> | CD151275 | 8  | AP005439 | e-124 | KIAA0443 (BAA23715)                                        | 2.1   |

|                     |          |                |          |       |                                            |       |
|---------------------|----------|----------------|----------|-------|--------------------------------------------|-------|
| 1I09 <sup>c,e</sup> | CD151313 | 1              | AP002903 | 3e-08 | ORF124 (AAF33653)                          | 3.2   |
| C13 <sup>f</sup>    | CD150770 | 1 <sup>c</sup> | AP003280 | 0     | ORF (NP_817268)                            | 8e-07 |
|                     |          | 4 <sup>c</sup> | AL662978 | 0     |                                            |       |
|                     |          | 10             | AC074232 | 0     |                                            |       |
| 2J08 <sup>a,f</sup> | CD151306 |                |          |       | homologous to ORF YKR058w~ORF18 (CAA60818) | 5.5   |

**No hits found**

|                     |          |    |          |       |  |  |
|---------------------|----------|----|----------|-------|--|--|
| 2C15 <sup>f</sup>   | CD150917 | 6  | AP003711 | 2e-14 |  |  |
| 2B06 <sup>f</sup>   | CD150890 | 10 | AC118132 | 4e-10 |  |  |
| 2L21 <sup>f</sup>   | CD151367 | 7  | AP005674 | e-123 |  |  |
| 2B21 <sup>c,f</sup> | CD151189 | 1  | AP003232 | 4e-27 |  |  |
| 1A11 <sup>c,e</sup> | CD151191 | 4  | AL606997 | e-101 |  |  |
| 3O09 <sup>c,f</sup> | CD151438 | 3  | AC133340 | 2e-17 |  |  |
| 1E03 <sup>c,e</sup> | CD150945 | 2  | AP005772 | e-136 |  |  |
| C52 <sup>f</sup>    | CD150808 | 9  | AP005397 | 0     |  |  |
| 2E05 <sup>b,f</sup> | CD150961 | 2  | AP004091 | e-133 |  |  |
| 1M15 <sup>e</sup>   | CD151114 | 11 | AC120533 | e-91  |  |  |
| 3O04 <sup>c,f</sup> | CD151146 | 3  | AC092557 | e-142 |  |  |

|                       |          |    |          |       |
|-----------------------|----------|----|----------|-------|
| 3F08 <sup>c,f</sup>   | CD151238 | 2  | AP004153 | 2e-45 |
| 2K10 <sup>a,c,f</sup> | CD151356 | 6  | AP003575 | 3e-19 |
| 2K06 <sup>f</sup>     | CD151082 | 1  | AP003288 | e-143 |
| 2K21 <sup>f</sup>     | CD151365 | 11 | AC137064 | 2e-27 |
| 1O13 <sup>e</sup>     | CD151137 | 4  | AL662988 | 4e-06 |
| 3I01 <sup>f</sup>     | CD151017 | 12 | AL831808 | 5e-23 |
| 1M03 <sup>e</sup>     | CD151108 | 12 | AL513403 | 5e-66 |
| 1M10 <sup>a,c,e</sup> | CD151397 | 9  | AP006162 | 1e-66 |
| 2N17 <sup>c,f</sup>   | CD151130 | 12 | AL513003 | 8e-15 |
| 3K02 <sup>c,f</sup>   | CD151052 | 1  | AP000836 | 0     |
| 1A07 <sup>e</sup>     | CD151171 | 6  | AP003514 | e-47  |
| 3C17 <sup>c,f</sup>   | CD150930 | 2  | AP005538 | 2e-09 |
| 2E03 <sup>b,f</sup>   | CD150949 | 12 | BX000511 | 1e-10 |
| 2H18 <sup>f</sup>     | CD151008 | 9  | AP006149 | 2e-20 |
| 2F13 <sup>a,f</sup>   | CD150943 |    |          |       |
| 1C14 <sup>a,e</sup>   | CD150902 |    |          |       |
| 2H13 <sup>a,f</sup>   | CD150979 |    |          |       |

|                     |          |
|---------------------|----------|
| 2P15 <sup>a,f</sup> | CD151151 |
| 1F07 <sup>a,e</sup> | CD151234 |
| 1D12 <sup>a,e</sup> | CD151225 |
| 2F09 <sup>a,f</sup> | CD151250 |
| 2F11 <sup>a,f</sup> | CD151260 |
| 2H07 <sup>a,f</sup> | CD151272 |
| 2H20 <sup>a,f</sup> | CD151278 |
| 2H09 <sup>a,f</sup> | CD151283 |
| 2J09 <sup>a,f</sup> | CD151314 |
| 2L11 <sup>a,f</sup> | CD151374 |
| 2N07 <sup>a,f</sup> | CD151387 |
| 2B12 <sup>a,f</sup> | CD151194 |
| 2D12 <sup>a,f</sup> | CD151228 |
| 3J23 <sup>a,f</sup> | CD151335 |
| 2N09 <sup>a,f</sup> | CD151402 |
| 2L09 <sup>a,f</sup> | CD151357 |
| 2J06 <sup>a,f</sup> | CD151041 |

|                     |          |
|---------------------|----------|
| 2H15 <sup>a,f</sup> | CD150993 |
| 1I12 <sup>a,e</sup> | CD151324 |
| 2N13 <sup>a,f</sup> | CD151104 |
| 1F06 <sup>a,e</sup> | CD150960 |
| 2L17 <sup>a,f</sup> | CD151089 |
| 1N18 <sup>a,e</sup> | CD151128 |
| 1K15 <sup>a,e</sup> | CD151069 |
| 1J12 <sup>a,e</sup> | CD151326 |

---

<sup>a</sup>Novel rice ESTs.

<sup>b</sup>ESTs assigned to chromosomes but not map on the molecular linkage map.

<sup>c</sup>EST co-localized with resistance QTL.

<sup>d</sup>Chr, chromosome.

<sup>e</sup>EST from cDNA library I.

<sup>f</sup>EST from cDNA library II.

<sup>g</sup>EST both from cDNA library I and II
